# Supplementary material for: OVO Positively Regulates Essential Maternal Pathways by Binding Near the Transcriptional Start Sites in the Drosophila Female Germline
Source: bioRxiv preprint, doi:10.1101/2023.11.01.565184, version 3 (2024-04-30)
Supplement: Table S4 [file 565184_file05.xlsx]

## Sheet: ReadMe
Column	Description
id	FlyBase gene identifier
baseMean	Mean expression of gene for both genotypes
log2FoldChange	log2 fold change of gene between UASp-OVO-B and UASp-GFP (positive indicates higher expression in UASp-OVO-B)
padj	adjusted p value between genotypes
gene	Common gene name
num_peaks	Number of OVO ChIP peaks overlapping length of gene
num_motifs	Number of significant OVO DNA binding motifs within overlapping OVO ChIP peak for gene
TSS	If OVO ChIP peak overlaps the TSS of gene

## Sheet: ovoB_chip_intersect
id	baseMean	log2FoldChange	padj	gene	num_peaks	num_motifs	TSS
FBgn0000003	1.46979	-3.35806	0.0864401	7SLRNA:CR32864	1	1	NO
FBgn0000008	593.948	0.42017	0.000828511	a	1	3	YES
FBgn0000014	635.139	-5.42195	2.94844e-169	abd-A	0	0	NO
FBgn0000015	9.12473	-3.78616	1.27926e-05	Abd-B	1	1	NO
FBgn0000017	1083.55	-0.204866	0.0272342	Abl	3	3	NO
FBgn0000018	262.288	0.413348	0.000508568	abo	0	0	NO
FBgn0000024	50.2095	-2.09118	5.96003e-13	Ace	1	0	YES
FBgn0000028	0.565716	-2.85999	0	acj6	0	0	NO
FBgn0000032	1610.78	1.01144	1.20263e-30	Acph-1	1	1	YES
FBgn0000037	6.21271	2.06678	0.0228	mAChR-A	1	3	YES
FBgn0000038	1.47313	1.38986	0.390214	nAChRbeta1	0	0	NO
FBgn0000039	1.30323	-2.37656	0.170167	nAChRalpha2	0	0	NO
FBgn0000042	41679.3	-0.215302	0.0110069	Act5C	3	6	YES
FBgn0000043	13380.4	-0.788171	1.55113e-10	Act42A	0	0	NO
FBgn0000044	17694.4	-3.18404	2.84648e-129	Act57B	0	0	NO
FBgn0000046	945.473	-2.10967	1.20104e-56	Act87E	0	0	NO
FBgn0000047	4.46924	5.36437	0	Act88F	0	0	NO
FBgn0000052	2644.36	0.441437	4.56283e-07	Pfas	0	0	NO
FBgn0000053	2229.12	0.66874	1.19637e-30	Gart	0	0	NO
FBgn0000055	5.0604	-0.50816	0.537426	Adh	2	4	YES
FBgn0000057	711.388	0.934713	1.15986e-16	adp	1	1	YES
FBgn0000063	192.62	0.523791	0.00245416	Mps1	0	0	NO
FBgn0000064	3986.69	-0.470181	2.0117e-08	Ald1	0	0	NO
FBgn0000075	28.9636	0.166591	0	amd	0	0	NO
FBgn0000077	191.448	0.375965	0.00609166	amx	1	2	YES
FBgn0000083	4049.69	-2.05478	1.19693e-87	AnxB9	0	0	NO
FBgn0000084	651.785	-0.29512	0.00246268	AnxB10	0	0	NO
FBgn0000092	1.15677	0.212965	0.913455	dyw	0	0	NO
FBgn0000097	1837.92	-1.07035	1.66117e-52	aop	0	0	NO
FBgn0000100	51471	0.186313	0.0148477	RpLP0	0	0	NO
FBgn0000108	31.7532	-0.450678	0.207887	Appl	3	9	NO
FBgn0000109	276.229	0.54699	0.000155388	Aprt	0	0	NO
FBgn0000114	11989.8	1.88041	1.23797e-147	bru1	2	4	YES
FBgn0000115	744.416	0.0392706	0.753441	Arl1	0	0	NO
FBgn0000116	7672.84	-1.30306	1.03543e-53	Argk1	0	0	NO
FBgn0000117	8239.62	-0.259332	5.20969e-06	arm	2	3	YES
FBgn0000119	380.678	-1.30711	3.78041e-32	arr	0	0	NO
FBgn0000137	0.559268	-1.48932	0	ase	0	0	NO
FBgn0000139	645.944	-0.0377997	0.784958	ash2	0	0	NO
FBgn0000140	1135.33	0.450361	0.000271662	asp	0	0	NO
FBgn0000146	3216.79	0.769694	6.89722e-20	aub	1	2	YES
FBgn0000147	348.015	1.30859	7.12366e-26	aurA	1	0	YES
FBgn0000150	17158.3	0.271112	2.59105e-05	awd	0	0	NO
FBgn0000152	310.544	-0.936753	3.88282e-13	Axs	0	0	NO
FBgn0000153	4.95565	-0.891052	0.375495	b	0	0	NO
FBgn0000157	0.950664	0.314702	0.889269	Dll	0	0	NO
FBgn0000158	124.265	1.27387	2.86762e-16	bam	1	1	YES
FBgn0000163	1724.49	-1.36108	5.41218e-36	baz	3	2	NO
FBgn0000166	234.032	11.0773	4.41315e-26	bcd	1	1	YES
FBgn0000173	2465.07	0.0237163	0.813264	ben	0	0	NO
FBgn0000179	2.24374	-2.12752	0.108398	bi	1	1	NO
FBgn0000180	346.061	-2.65615	5.77325e-86	bib	0	0	NO
FBgn0000181	28917	0.414043	3.91753e-09	bic	0	0	NO
FBgn0000183	1933.05	0.30327	5.22986e-05	BicD	1	0	NO
FBgn0000212	1801.28	-0.58349	2.22883e-16	brm	0	0	NO
FBgn0000221	128.14	0.655881	0.000110161	brn	1	2	YES
FBgn0000228	779.156	0.542223	2.57449e-10	Nin	0	0	NO
FBgn0000229	601.282	-1.0337	2.25418e-33	bsk	0	0	NO
FBgn0000233	1.09137	1.52765	0.436787	btd	0	0	NO
FBgn0000239	3192.05	0.661018	1.28565e-17	bur	1	0	NO
FBgn0000241	1.12585	-0.866373	0.642831	bw	0	0	NO
FBgn0000244	1229.65	-2.52375	1.61062e-80	by	0	0	NO
FBgn0000246	445.544	2.21172	5.09813e-87	c(3)G	1	2	YES
FBgn0000247	831.955	-0.240491	0.0309805	ca	1	1	YES
FBgn0000250	2426.62	0.0406055	0.564895	cact	1	1	NO
FBgn0000251	603.715	8.13065	1.18266e-93	cad	2	3	YES
FBgn0000253	9281.83	0.201909	0.0197499	Cam	3	7	YES
FBgn0000256	554.533	-1.58269	2.92335e-62	capu	0	0	NO
FBgn0000257	514.768	0.404589	7.32176e-06	car	0	0	NO
FBgn0000259	2864.29	0.456692	9.74759e-09	CkIIbeta	3	2	NO
FBgn0000261	1977.67	-0.945386	2.81118e-24	Cat	0	0	NO
FBgn0000273	1505.4	-0.353746	1.76792e-05	Pka-C1	0	0	NO
FBgn0000274	17.9666	1.53562	0.0010177	Pka-C2	0	0	NO
FBgn0000276	2.88302	1.081	0.372438	CecA1	0	0	NO
FBgn0000277	0.988411	-1.14789	0.591981	CecA2	0	0	NO
FBgn0000278	0.891182	-3.47174	0.231098	CecB	0	0	NO
FBgn0000279	7.7426	-3.78459	0.00144821	CecC	0	0	NO
FBgn0000283	2735.58	0.184584	0.00716306	Cp190	0	0	NO
FBgn0000286	461.071	0.351319	0.000312506	Cf2	0	0	NO
FBgn0000289	2774.67	0.145127	0.0565228	cg	0	0	NO
FBgn0000299	18862.3	-1.04947	3.05288e-15	Col4a1	0	0	NO
FBgn0000307	1436.19	0.175361	0.0927654	chif	1	0	NO
FBgn0000308	13729.8	-0.508495	2.11982e-15	chic	1	3	YES
FBgn0000316	1330.17	-0.0619394	0.507452	cin	0	0	NO
FBgn0000317	871.406	0.13424	0.125628	ck	2	1	NO
FBgn0000318	1372.75	0.272933	0.000707482	cl	0	0	NO
FBgn0000319	9843.01	-0.00402185	0.955819	Chc	1	3	YES
FBgn0000320	2198.42	-1.70938	1.47964e-64	eya	0	0	NO
FBgn0000326	398.603	0.0222493	0.87139	clt	0	0	NO
FBgn0000330	392.351	-0.171887	0.116607	cm	0	0	NO
FBgn0000337	1.36196	1.76617	0.340729	cn	0	0	NO
FBgn0000339	540.656	0.202499	0.0339634	cni	0	0	NO
FBgn0000346	296.312	0.388481	0.00237967	comt	0	0	NO
FBgn0000351	277.587	4.13669	7.74645e-99	cort	1	1	YES
FBgn0000352	509.104	0.433827	1.07927e-05	cos	0	0	NO
FBgn0000355	6838.17	13.9796	1.04039e-44	Cp15	1	0	NO
FBgn0000356	1677.25	10.4974	1.55088e-35	Cp16	0	0	NO
FBgn0000357	2637.93	8.20326	3.86358e-37	Cp18	0	0	NO
FBgn0000358	6201.5	15.0833	1.13538e-36	Cp19	0	0	NO
FBgn0000359	21204	13.2272	1.25095e-113	Cp36	0	0	NO
FBgn0000360	36610.1	16.9398	9.65753e-54	Cp38	0	0	NO
FBgn0000370	2639.99	-0.192364	0.00119459	crc	1	1	YES
FBgn0000376	649.673	1.24876	1.12743e-36	crm	1	6	YES
FBgn0000377	961.832	-0.0309706	0.725421	crn	0	0	NO
FBgn0000382	1277.59	-0.831658	6.56566e-18	csw	2	4	YES
FBgn0000384	673.547	0.618551	8.03183e-11	cta	0	0	NO
FBgn0000394	341.059	-0.824911	1.39351e-12	cv	0	0	NO
FBgn0000395	221.12	-1.3254	8.42136e-21	cv-2	0	0	NO
FBgn0000404	4457.11	1.88776	6.28861e-99	CycA	1	1	NO
FBgn0000405	9191.14	3.37255	0	CycB	1	1	YES
FBgn0000406	41.3068	-1.55926	0.00224873	Cyt-b5-r	0	0	NO
FBgn0000412	6523.21	0.131321	0.0189477	D1	0	0	NO
FBgn0000414	987.06	-1.92859	1.56534e-98	Dab	1	1	NO
FBgn0000416	28187.5	-0.873473	3.32066e-13	Sap-r	1	2	YES
FBgn0000422	4.12373	-2.49141	0.0120851	Ddc	0	0	NO
FBgn0000426	737.467	0.312508	0.000825402	SmF	0	0	NO
FBgn0000427	7696.34	2.4969	4.7081e-09	dec	0	0	NO
FBgn0000439	1.86361	-0.256282	0.853125	Dfd	0	0	NO
FBgn0000447	1451.65	0.460918	1.0444e-10	Dhod	0	0	NO
FBgn0000448	2.17361	-1.21562	0.413979	Hr3	4	8	NO
FBgn0000449	65.7721	0.869465	0.00238959	dib	0	0	NO
FBgn0000451	128.525	-3.41894	2.96776e-32	ect	0	0	NO
FBgn0000454	11180.9	-0.274159	0.422889	Dip-B	0	0	NO
FBgn0000455	924.747	-0.657852	5.13647e-09	Dip-C	0	0	NO
FBgn0000459	59.2626	-3.48597	5.18292e-26	disco	0	0	NO
FBgn0000463	682.992	1.25326	2.73848e-28	Dl	3	3	YES
FBgn0000464	33.6849	-1.07378	0.000489699	Lar	0	0	NO
FBgn0000473	52.9757	-3.74903	5.02038e-20	Cyp6a2	0	0	NO
FBgn0000477	4.9274	-2.38936	0.0109017	DNaseII	0	0	NO
FBgn0000479	793.158	-0.196655	0.0167695	dnc	4	9	YES
FBgn0000482	589.216	-0.246377	0.0256617	dor	0	0	NO
FBgn0000489	831.052	-3.02947	1.50371e-157	Pka-C3	0	0	NO
FBgn0000490	350.038	-2.42482	5.66493e-35	dpp	0	0	NO
FBgn0000492	0.617963	-3.04156	0	Dr	0	0	NO
FBgn0000499	811.683	-0.312232	0.000780515	dsh	0	0	NO
FBgn0000504	273.817	-3.28454	1.9228e-85	dsx	0	0	NO
FBgn0000520	359.129	0.078615	0.664185	dwg	1	0	YES
FBgn0000524	1010.74	-0.223986	0.00117296	dx	0	0	NO
FBgn0000527	0.707636	-3.18607	0	e	0	0	NO
FBgn0000533	400.908	1.54821	2.7433e-34	ea	1	2	YES
FBgn0000535	6.76311	1.91972	0.0095989	eag	3	10	YES
FBgn0000536	420.772	0.151409	0.188372	eas	1	1	NO
FBgn0000541	3909.15	-0.0442034	0.55396	E(bx)	1	1	YES
FBgn0000542	625.972	-2.1126	1.00683e-52	ec	0	0	NO
FBgn0000543	674.418	-0.319774	0.00109272	ecd	0	0	NO
FBgn0000546	809.166	-0.460939	6.69449e-08	EcR	0	0	NO
FBgn0000547	3547.77	-1.10282	6.76009e-22	ed	1	2	NO
FBgn0000551	0.554636	-0.439822	0	Edg78E	0	0	NO
FBgn0000557	78.3886	-3.82694	4.33891e-44	eEF1alpha2	0	0	NO
FBgn0000559	98950	0.192432	0.000632004	eEF2	0	0	NO
FBgn0000562	2109.04	-0.0128774	0.893886	egl	1	0	NO
FBgn0000565	383.067	0.0086145	0.946791	MsrA	0	0	NO
FBgn0000566	1399.48	1.01146	5.58317e-18	Cth	0	0	NO
FBgn0000567	254.729	-1.08639	1.42502e-15	Eip74EF	3	4	NO
FBgn0000568	3810.99	-1.82642	3.61007e-66	Eip75B	3	4	YES
FBgn0000575	1953.24	-0.747983	4.52175e-13	emc	1	1	NO
FBgn0000576	1.28885	-3.20319	0.0704648	ems	0	0	NO
FBgn0000577	3.78285	-2.35018	0.016562	en	0	0	NO
FBgn0000578	1876.14	-1.41709	5.10489e-68	ena	1	1	NO
FBgn0000579	9173.14	0.555173	1.82677e-21	Eno	0	0	NO
FBgn0000581	2320.08	0.151892	0.0578876	E(Pc)	0	0	NO
FBgn0000588	313.46	0.234297	0.0350401	esc	0	0	NO
FBgn0000591	0.695037	-1.42112	0	E(spl)m8-HLH	0	0	NO
FBgn0000592	87.4911	-3.59066	1.54978e-17	Est-6	0	0	NO
FBgn0000594	0.822778	-2.50767	0.265787	Est-P	0	0	NO
FBgn0000611	3045.88	-0.457206	5.35233e-16	exd	0	0	NO
FBgn0000615	3380.35	6.52327	0	exu	2	3	YES
FBgn0000617	506.504	0.384655	2.80961e-05	Taf9	0	0	NO
FBgn0000618	196.649	0.0370823	0.814547	e(y)2	0	0	NO
FBgn0000629	651.018	0.11488	0.236494	E(z)	0	0	NO
FBgn0000633	28.3886	-3.19478	3.85991e-13	tei	1	0	YES
FBgn0000635	4460.84	-2.6237	1.36266e-144	Fas2	3	3	YES
FBgn0000636	4191.79	-2.98734	6.13253e-29	Fas3	0	0	NO
FBgn0000640	1.89944	-4.63144	0.0160383	Fbp2	0	0	NO
FBgn0000644	61.8386	3.2121	3.3321e-08	Fcp3C	0	0	NO
FBgn0000658	16.3337	-3.82603	1.37451e-09	fj	0	0	NO
FBgn0000662	1136.57	0.0773254	0.311076	fl(2)d	1	2	YES
FBgn0000667	2722.93	-0.664295	3.44729e-19	Actn	1	5	NO
FBgn0000709	879.327	0.526555	1.2484e-13	fliI	0	0	NO
FBgn0000711	725.761	-0.598716	5.30413e-15	flw	2	3	YES
FBgn0000719	1010.5	-0.60021	9.13009e-10	fog	1	2	YES
FBgn0000721	3091.2	-0.621074	6.06686e-19	for	2	2	YES
FBgn0000723	367.996	-1.36121	2.50241e-29	FER	0	0	NO
FBgn0000808	86.0035	1.35136	1.32429e-08	gd	0	0	NO
FBgn0000810	875.966	0.741476	4.86179e-14	fs(1)K10	0	0	NO
FBgn0000826	178.414	1.65311	2.59483e-20	png	1	1	YES
FBgn0000927	1193.92	5.7714	0	fs(1)Ya	2	1	YES
FBgn0000928	462.061	-1.83162	1.10421e-50	fs(1)Yb	1	0	NO
FBgn0000964	3670.73	-0.383494	8.67552e-05	tj	0	0	NO
FBgn0000996	1000.09	0.280487	0.00251116	dup	0	0	NO
FBgn0001075	1.24098	-1.44786	0.433041	ft	0	0	NO
FBgn0001078	737.25	0.501907	1.3368e-06	ftz-f1	4	1	YES
FBgn0001079	392.05	-0.27129	0.013097	fu	0	0	NO
FBgn0001083	6.23943	0.732075	0.372816	fw	0	0	NO
FBgn0001084	54.9347	0.179714	0.493255	fy	0	0	NO
FBgn0001085	490.043	2.40344	1.16771e-65	fz	1	3	YES
FBgn0001086	639.954	-0.337741	0.00137439	fzy	0	0	NO
FBgn0001087	1138.81	0.564814	4.45714e-19	g	2	3	YES
FBgn0001089	73.0605	-2.6468	8.16175e-14	Gal	0	0	NO
FBgn0001090	147.864	3.64076	5.91064e-12	bnb	0	0	NO
FBgn0001091	6041.67	0.475348	1.19515e-16	Gapdh1	0	0	NO
FBgn0001092	8607.11	0.527423	1.85269e-10	Gapdh2	0	0	NO
FBgn0001098	7145.42	-1.12009	3.24667e-38	Gdh	0	0	NO
FBgn0001099	6.56048	0.51933	0.57314	gdl	0	0	NO
FBgn0001104	2348.93	-0.0921641	0.200013	Galphai	2	3	NO
FBgn0001105	5827.23	-0.327159	4.25813e-05	Gbeta13F	0	0	NO
FBgn0001108	1384.27	0.18384	0.0425522	DCTN1-p150	0	0	NO
FBgn0001112	1.81535	2.11354	0.280537	Gld	0	0	NO
FBgn0001114	393.572	-5.18216	1.39752e-36	Glt	0	0	NO
FBgn0001120	1009.96	6.60006	5.20629e-266	gnu	1	2	YES
FBgn0001122	1955.69	-1.9516	2.31915e-181	Galphao	2	3	YES
FBgn0001123	801.373	-1.59492	3.25856e-91	Galphas	0	0	NO
FBgn0001124	1748.38	-0.0180281	0.825709	Got1	0	0	NO
FBgn0001125	5424.86	0.0329061	0.709193	Got2	0	0	NO
FBgn0001128	1749.51	-0.241213	0.0847782	Gpdh1	0	0	NO
FBgn0001133	409.928	-0.01655	0.898474	grau	0	0	NO
FBgn0001137	429.065	-0.118241	0.318073	grk	1	1	YES
FBgn0001139	2475.98	-0.115842	0.0519952	gro	0	0	NO
FBgn0001142	2968.8	3.85972	0	Gs1	1	2	YES
FBgn0001145	1768.23	-4.32575	4.07522e-56	Gs2	2	3	NO
FBgn0001149	6889.9	-0.09257	0.286258	GstD1	0	0	NO
FBgn0001150	4.34193	0.313462	0.752202	gt	0	0	NO
FBgn0001168	972.275	-1.57484	8.05188e-26	h	0	0	NO
FBgn0001169	1065.34	0.0619236	0.42128	H	0	0	NO
FBgn0001179	599.111	0.373544	2.77481e-05	hay	0	0	NO
FBgn0001180	476.497	1.40735	3.43017e-26	hb	1	2	YES
FBgn0001185	301.087	-0.043396	0.803623	her	0	0	NO
FBgn0001186	3927.06	-0.310906	0.000274591	Hex-A	1	0	NO
FBgn0001187	8.44774	-2.83026	0.003084	Hex-C	0	0	NO
FBgn0001189	632.007	-0.983225	4.91962e-27	hfw	0	0	NO
FBgn0001197	7311.72	0.322021	0.000162135	His2Av	1	5	NO
FBgn0001202	546.862	0.088522	0.419397	hook	0	0	NO
FBgn0001206	305.887	-0.57675	3.29382e-06	Hmr	1	1	YES
FBgn0001208	16.1146	-0.82466	0.104668	Hn	0	0	NO
FBgn0001215	5964.04	-0.0405211	0.766342	Hrb98DE	1	1	NO
FBgn0001216	6.51848	-1.35956	0.0703926	Hsc70-1	0	0	NO
FBgn0001217	103.182	-2.36699	4.32478e-17	Hsc70-2	0	0	NO
FBgn0001218	10505.8	0.727584	3.68872e-10	Hsc70-3	2	2	YES
FBgn0001220	6160.91	0.170857	0.0867738	Hsc70-5	0	0	NO
FBgn0001222	1020.08	0.0264434	0.884738	Hsf	1	0	NO
FBgn0001224	533.435	-3.6927	3.56223e-59	Hsp23	0	0	NO
FBgn0001225	3318.88	1.61606	0.000455929	Hsp26	0	0	NO
FBgn0001226	2270.44	1.29519	4.75139e-15	Hsp27	1	0	NO
FBgn0001227	489.692	-5.31771	2.07641e-169	Hsp67Ba	1	2	NO
FBgn0001229	83.8363	-3.80824	1.38681e-17	Hsp67Bc	1	0	YES
FBgn0001230	531.458	-4.75604	1.73804e-11	Hsp68	0	0	NO
FBgn0001233	45535.9	0.495112	0.000997401	Hsp83	0	0	NO
FBgn0001234	1211.98	-0.978986	0.00973325	lncRNA:Hsromega	4	0	NO
FBgn0001235	156.972	-3.92432	7.70507e-41	hth	0	0	NO
FBgn0001247	1414.78	0.0534591	0.477808	Ide	0	0	NO
FBgn0001248	3193.65	0.239238	0.00158142	Idh	2	1	YES
FBgn0001250	780.029	-2.51994	1.04833e-118	if	0	0	NO
FBgn0001255	17.304	-1.37234	0.00890619	ImpE3	0	0	NO
FBgn0001257	200.614	3.04067	6.96551e-11	ImpL2	0	0	NO
FBgn0001258	51.9427	-3.24511	1.84469e-27	Ldh	0	0	NO
FBgn0001259	1.07983	-3.81076	0.0912471	in	0	0	NO
FBgn0001269	4.63734	-1.57353	0.0695447	inv	0	0	NO
FBgn0001276	132.074	0.194933	0.319906	ix	0	0	NO
FBgn0001280	898.772	0.675498	6.15632e-13	janA	0	0	NO
FBgn0001291	634.094	-0.835917	8.9216e-13	Jra	0	0	NO
FBgn0001296	3927.31	-0.796511	6.8114e-10	kar	0	0	NO
FBgn0001297	2453.17	-2.08117	3.49734e-38	kay	1	1	YES
FBgn0001301	748.554	-0.220753	0.0148813	kel	0	0	NO
FBgn0001308	3095.15	-0.325352	1.09407e-06	Khc	1	0	YES
FBgn0001311	11.0621	0.69966	0.255906	kkv	1	1	YES
FBgn0001316	4779.64	0.543451	6.28808e-17	klar	4	6	YES
FBgn0001319	0.696923	-1.32945	0	kn	2	3	NO
FBgn0001320	21.517	-3.45814	4.17871e-11	kni	0	0	NO
FBgn0001321	14.4898	-0.550267	0.26908	knk	1	2	YES
FBgn0001323	20.8399	-4.57675	1.28526e-13	knrl	1	2	YES
FBgn0001324	1164.48	-0.685816	1.15696e-14	kto	0	0	NO
FBgn0001325	0.950048	-0.863694	0.699051	Kr	0	0	NO
FBgn0001330	811.875	0.757235	2.62662e-12	kz	0	0	NO
FBgn0001341	1451.22	0.322454	0.0209504	Mybbp1A	0	0	NO
FBgn0001404	1159.11	-0.493407	3.79234e-05	egh	0	0	NO
FBgn0001491	435.665	-0.158958	0.135098	l(1)10Bb	0	0	NO
FBgn0001565	2428.96	0.29729	0.0115347	Hlc	1	2	YES
FBgn0001612	709.889	0.34824	0.000531214	Grip91	1	0	NO
FBgn0001624	3184.81	-1.24295	1.26889e-86	dlg1	3	5	YES
FBgn0001941	2610.6	-1.07401	1.37088e-34	ifc	0	0	NO
FBgn0001942	36806.4	-0.0874469	0.285926	eIF4A	1	2	YES
FBgn0001961	1687.09	-0.720444	3.18625e-23	Arpc1	0	0	NO
FBgn0001965	963.772	-0.602137	2.19533e-16	Sos	0	0	NO
FBgn0001967	0.93716	-0.878675	0.642498	NimC3	0	0	NO
FBgn0001970	235.174	0.159088	0.208913	Pgant35A	0	0	NO
FBgn0001977	620.359	-0.49235	3.917e-08	CIAPIN1	0	0	NO
FBgn0001978	2072.53	0.735367	3.02045e-27	stc	1	1	YES
FBgn0001986	1278.29	0.237447	0.00856108	Mtr4	0	0	NO
FBgn0001987	317.627	-1.93379	2.05424e-23	Gli	0	0	NO
FBgn0001989	1086.94	-0.160918	0.0963855	ND-B17	0	0	NO
FBgn0001990	342.56	0.351909	0.00306447	wek	0	0	NO
FBgn0001991	236.337	-4.86347	2.43356e-83	Ca-alpha1D	0	0	NO
FBgn0001994	2516.2	-0.0464602	0.543097	crp	6	7	NO
FBgn0001995	538.305	0.420838	3.88904e-06	mRpL4	0	0	NO
FBgn0002021	697.219	0.522353	3.14617e-10	l(2)37Bb	0	0	NO
FBgn0002022	1002.47	0.110685	0.285428	Catsup	0	0	NO
FBgn0002023	1.8893	-1.93453	0.184859	Lim3	1	7	YES
FBgn0002031	3411.03	0.538697	3.25315e-08	Phb1	0	0	NO
FBgn0002036	113.556	0.105349	0.661621	CG10561	0	0	NO
FBgn0002044	1722.33	0.0701196	0.436416	swm	0	0	NO
FBgn0002069	2694.69	0.357339	2.52304e-06	AspRS	0	0	NO
FBgn0002121	3137.22	-0.0313563	0.70307	l(2)gl	2	0	NO
FBgn0002174	1227.8	0.533304	6.17041e-08	CG5504	1	2	YES
FBgn0002183	3512.42	0.0513365	0.403386	dre4	0	0	NO
FBgn0002283	424.557	1.03	1.6571e-18	l(3)73Ah	0	0	NO
FBgn0002284	3408.94	0.252113	0.000178046	Prosbeta6	0	0	NO
FBgn0002306	76.8169	-2.96466	5.81492e-32	sas	0	0	NO
FBgn0002354	133.574	0.485249	0.00303696	l(3)87Df	0	0	NO
FBgn0002413	3924.35	0.612661	2.52394e-28	dco	1	5	YES
FBgn0002431	4974.55	-0.838177	1.80086e-45	hyd	0	0	NO
FBgn0002441	788.748	-0.404191	0.000247312	l(3)mbt	1	1	NO
FBgn0002466	798.936	-0.85056	5.48811e-11	sti	1	2	YES
FBgn0002521	1020.64	0.112195	0.159706	pho	0	0	NO
FBgn0002522	0.759241	-2.33	0	lab	0	0	NO
FBgn0002524	885.217	0.143028	0.0733956	lace	0	0	NO
FBgn0002525	3238.7	-0.320909	9.91435e-05	Lam	0	0	NO
FBgn0002526	8153.69	-1.55636	2.50083e-53	LanA	0	0	NO
FBgn0002542	1211.74	0.0259186	0.809453	lds	0	0	NO
FBgn0002543	166.015	-2.36986	6.67772e-42	robo2	0	0	NO
FBgn0002552	454.078	0.578563	1.75877e-06	lin	0	0	NO
FBgn0002562	1.97322	-3.85015	0.0226794	Lsp1alpha	0	0	NO
FBgn0002563	17.8229	-3.93907	2.59093e-05	Lsp1beta	0	0	NO
FBgn0002564	3.50947	-0.739925	0.557822	Lsp1gamma	0	0	NO
FBgn0002565	23.6894	-5.50778	0.000456383	Lsp2	0	0	NO
FBgn0002566	1083.82	-0.0315463	0.698081	lt	1	1	NO
FBgn0002567	1220.85	4.23272	0	Rab32	3	5	YES
FBgn0002569	0.561131	0.0903381	0	Mal-A2	0	0	NO
FBgn0002570	3.06666	4.82064	0.000721233	Mal-A1	0	0	NO
FBgn0002571	2.53079	1.80488	0.204747	Mal-A3	0	0	NO
FBgn0002576	6.25013	-5.57606	1.21997e-05	lz	0	0	NO
FBgn0002577	8.65558	-0.935342	0.142879	m	2	4	YES
FBgn0002579	29329	-0.0265631	0.804461	RpL36	0	0	NO
FBgn0002590	25466.4	-0.808677	5.08987e-24	RpS5a	0	0	NO
FBgn0002592	12.9692	-1.13001	0.0420506	E(spl)m2-BFM	0	0	NO
FBgn0002593	48645.3	0.0884731	0.245309	RpLP1	0	0	NO
FBgn0002609	366.355	0.107028	0.625124	E(spl)m3-HLH	0	0	NO
FBgn0002622	35143.8	-0.0061829	0.954436	RpS3	1	1	YES
FBgn0002626	23892.8	0.0195147	0.852699	RpL32	0	0	NO
FBgn0002631	0.53634	-0.569496	0	E(spl)m5-HLH	0	0	NO
FBgn0002632	1.15988	0.51567	0.777792	E(spl)m6-BFM	0	0	NO
FBgn0002633	32.7497	-0.909182	0.00354913	E(spl)m7-HLH	0	0	NO
FBgn0002638	3786.91	0.671279	1.61367e-31	Rcc1	0	0	NO
FBgn0002641	403.237	0.694562	1.166e-10	mal	0	0	NO
FBgn0002643	1990.98	-1.09548	7.4764e-28	mam	4	2	YES
FBgn0002645	3495.89	-1.03998	5.74591e-60	Map205	0	0	NO
FBgn0002673	268.946	2.12666	2.39109e-48	twe	0	0	NO
FBgn0002707	480.148	0.719538	7.42184e-17	mei-9	0	0	NO
FBgn0002709	15.6834	-0.707299	0.131758	mei-218	0	0	NO
FBgn0002715	141.658	0.736033	2.47724e-05	mei-S332	0	0	NO
FBgn0002716	17.3545	0.34744	0.45039	mei-W68	0	0	NO
FBgn0002719	3889.64	-1.68443	1.74439e-35	Men	0	0	NO
FBgn0002723	254.511	-0.155079	0.190324	Met	1	4	NO
FBgn0002732	6.60761	1.30928	0.239262	E(spl)malpha-BFM	0	0	NO
FBgn0002733	217.007	-0.325834	0.19726	E(spl)mbeta-HLH	0	0	NO
FBgn0002735	1.74692	0.144451	0.934387	E(spl)mgamma-HLH	0	0	NO
FBgn0002736	1245.18	0.388117	3.75896e-05	mago	0	0	NO
FBgn0002772	2361.97	-3.41463	9.64706e-165	Mlc1	0	0	NO
FBgn0002773	9237.23	-3.78402	3.8131e-180	Mlc2	0	0	NO
FBgn0002774	1031.48	-0.0789528	0.435568	mle	0	0	NO
FBgn0002775	315.164	0.304847	0.0291771	msl-3	0	0	NO
FBgn0002778	981.762	1.94958	9.37908e-119	mnd	1	0	NO
FBgn0002780	12406.6	0.680313	6.19957e-13	mod	0	0	NO
FBgn0002781	4981.5	-0.0466113	0.615183	mod(mdg4)	0	0	NO
FBgn0002783	2750.05	-0.0992198	0.166653	mor	0	0	NO
FBgn0002787	2316.49	0.403251	8.50007e-07	Rpn8	1	1	NO
FBgn0002789	4602.21	-3.77029	4.03914e-245	Mp20	0	0	NO
FBgn0002791	582.815	0.4574	2.11939e-08	mr	0	0	NO
FBgn0002842	1.66323	3.92511	0.0188542	sa	0	0	NO
FBgn0002855	5.86396	-1.45949	0.0931982	Acp26Aa	0	0	NO
FBgn0002856	1.01559	-0.253329	0.92334	Acp26Ab	0	0	NO
FBgn0002862	0.777903	-2.41719	0	Mst87F	0	0	NO
FBgn0002868	2064.52	-3.82692	5.96325e-178	MtnA	0	0	NO
FBgn0002869	2.6289	-2.33016	0.0751688	MtnB	0	0	NO
FBgn0002872	782.457	1.19863	3.31347e-24	mu2	0	0	NO
FBgn0002873	1041.95	0.84889	2.96157e-22	mud	1	1	YES
FBgn0002878	410.472	-0.283013	0.0327926	mus101	0	0	NO
FBgn0002887	379.515	0.456138	0.000306473	mus201	0	0	NO
FBgn0002891	290.209	0.712946	5.53155e-07	PolZ1	0	0	NO
FBgn0002899	352.293	0.358538	0.0061791	mus301	1	1	YES
FBgn0002901	174.82	0.933459	8.22989e-11	mus304	0	0	NO
FBgn0002905	437.486	0.225242	0.0954699	PolQ	1	3	YES
FBgn0002906	428.416	0.619315	1.852e-06	Blm	0	0	NO
FBgn0002917	1.76475	-0.84224	0.554248	na	0	0	NO
FBgn0002921	7739.45	-0.716362	1.59745e-17	Atpalpha	2	5	YES
FBgn0002924	888.124	-0.0710747	0.598864	ncd	1	1	YES
FBgn0002926	1563.72	0.0705155	0.872394	ndl	0	0	NO
FBgn0002930	225.277	-5.50701	5.30344e-80	nec	0	0	NO
FBgn0002931	34.0908	-3.64989	1.02657e-18	net	0	0	NO
FBgn0002932	412.191	0.531185	4.36633e-06	neur	3	3	YES
FBgn0002939	48.7725	-3.99046	4.10503e-21	ninaD	0	0	NO
FBgn0002940	0.558529	0.150164	0	ninaE	0	0	NO
FBgn0002945	175.16	-1.91217	8.70758e-40	nkd	0	0	NO
FBgn0002948	393.34	2.09931	1.13016e-82	nod	1	2	YES
FBgn0002962	2402.78	3.37337	1.406e-188	nos	1	2	YES
FBgn0002973	774.148	0.0138088	0.907633	numb	2	4	YES
FBgn0002989	390.019	0.222729	0.0439982	okr	0	0	NO
FBgn0003008	352.259	0.167106	0.137022	or	0	0	NO
FBgn0003009	69.4126	-0.820891	0.00698069	ord	0	0	NO
FBgn0003015	1367.07	3.25402	1.61733e-167	osk	2	3	YES
FBgn0003016	1759.2	-1.19232	2.12567e-73	osp	3	4	NO
FBgn0003023	3686.65	2.40671	3.04457e-90	otu	1	6	YES
FBgn0003028	2605.38	4.89645	1.23607e-247	ovo	2	5	YES
FBgn0003041	1270.61	-0.26288	0.00190043	pbl	1	1	NO
FBgn0003042	254.053	0.811332	1.16853e-11	Pc	0	0	NO
FBgn0003044	1875.58	0.257814	0.000514312	Pcl	0	0	NO
FBgn0003048	1004.45	-0.856761	3.7157e-20	pcx	0	0	NO
FBgn0003053	1569.89	-1.29259	1.5417e-19	peb	1	1	NO
FBgn0003062	5717.69	0.577731	1.14207e-11	Fib	0	0	NO
FBgn0003068	299.271	-0.721412	3.21075e-06	per	0	0	NO
FBgn0003071	1067.27	0.0333071	0.773887	Pfk	1	0	NO
FBgn0003074	2443	0.707669	4.6488e-19	Pgi	1	0	YES
FBgn0003076	1338.24	0.907861	4.24043e-34	Pgm1	0	0	NO
FBgn0003079	599.118	0.146251	0.172474	Raf	6	8	NO
FBgn0003082	678.607	0.608081	1.15005e-11	phr	1	3	YES
FBgn0003087	255.895	1.22659	2.40928e-15	pim	0	0	NO
FBgn0003089	106.638	-0.911316	0.000209042	pip	0	0	NO
FBgn0003090	212.578	-1.92806	2.78921e-20	pk	1	1	NO
FBgn0003091	98.314	-2.43388	1.36024e-10	Pkc53E	0	0	NO
FBgn0003093	693.775	-0.59746	3.13826e-11	Pkc98E	0	0	NO
FBgn0003114	76.2674	9.46004	3.34107e-19	plu	1	2	YES
FBgn0003116	320.229	0.862135	5.7039e-14	pn	0	0	NO
FBgn0003117	24.1812	-7.55257	7.63746e-12	pnr	0	0	NO
FBgn0003118	400.475	-0.952699	1.95157e-18	pnt	1	1	NO
FBgn0003124	2753.38	1.1752	2.16622e-71	polo	1	2	YES
FBgn0003129	169.932	-6.8411	1.5022e-59	Poxm	0	0	NO
FBgn0003134	1605.43	0.0534116	0.561603	Pp1alpha-96A	0	0	NO
FBgn0003137	10906.1	-4.01987	2.22142e-49	Ppn	0	0	NO
FBgn0003139	1088.44	0.365735	2.86928e-05	PpV	0	0	NO
FBgn0003141	798.848	0.373267	0.00215998	pr	0	0	NO
FBgn0003149	4587.68	-3.26423	3.55318e-116	Prm	4	0	NO
FBgn0003159	1180.73	-0.191383	0.0507835	CG2841	2	2	YES
FBgn0003162	47.5347	-0.130739	0.682711	Pu	2	2	YES
FBgn0003165	2595.41	-0.516995	8.44154e-08	pum	4	3	NO
FBgn0003169	1083.52	-0.396127	9.44265e-07	put	1	2	YES
FBgn0003174	81.2426	0.225956	0.541256	pwn	0	0	NO
FBgn0003175	749.365	-0.369272	0.00332026	px	2	3	NO
FBgn0003187	591.357	2.63521	6.70459e-171	qua	1	2	YES
FBgn0003189	4505.44	0.514883	1.44665e-09	r	1	1	NO
FBgn0003204	3366.23	0.924104	3.22996e-22	ras	1	4	YES
FBgn0003205	1945.04	-0.249382	6.6413e-05	Ras85D	0	0	NO
FBgn0003206	1840.93	-2.32632	1.58464e-126	Ras64B	0	0	NO
FBgn0003209	706.299	-0.876839	2.26136e-18	raw	1	1	NO
FBgn0003210	1124.77	0.460074	5.67195e-09	rb	0	0	NO
FBgn0003218	793.959	0.658767	3.9304e-10	rdgB	1	1	YES
FBgn0003227	222.949	0.077797	0.617017	rec	0	0	NO
FBgn0003231	2924.5	-0.205823	0.036707	ref(2)P	1	1	NO
FBgn0003250	6.86734	1.91611	0.0292898	Rh4	1	0	NO
FBgn0003254	0.862978	-0.777246	0.731886	rib	1	0	NO
FBgn0003255	46.995	-1.12973	0.000196705	rk	0	0	NO
FBgn0003256	895.485	-0.230809	0.0499399	rl	0	0	NO
FBgn0003257	2233.43	1.07478	2.58008e-27	r-l	0	0	NO
FBgn0003261	22100.7	-0.214355	0.128035	Rm62	1	0	NO
FBgn0003268	918.313	-0.00107034	0.995004	rod	0	0	NO
FBgn0003274	47155.4	-0.00889024	0.942458	RpLP2	0	0	NO
FBgn0003275	939.336	0.341328	0.000983648	Polr2F	0	0	NO
FBgn0003277	2940.01	-0.369808	1.30275e-10	Polr2A	0	0	NO
FBgn0003278	1492.12	0.760648	6.14939e-19	Polr1B	0	0	NO
FBgn0003279	60973.4	0.141307	0.0720627	RpL4	0	0	NO
FBgn0003285	81.2989	-2.49536	4.59777e-34	rst	0	0	NO
FBgn0003292	306.109	1.78734	3.67068e-54	rt	1	3	YES
FBgn0003295	1.25755	1.837	0.340729	ru	0	0	NO
FBgn0003301	372.933	-2.76805	4.95102e-121	rut	1	3	YES
FBgn0003302	204.191	1.17794	9.06946e-18	rux	0	0	NO
FBgn0003308	7.23193	-1.03855	0.122974	ry	0	0	NO
FBgn0003310	1324.13	1.62003	7.97775e-36	S	2	2	NO
FBgn0003312	164.575	0.521476	0.0366998	sad	0	0	NO
FBgn0003317	824.304	-0.518071	2.85214e-06	sax	0	0	NO
FBgn0003321	1159.6	-0.473682	5.03008e-10	sbr	0	0	NO
FBgn0003326	12.2197	-3.08295	5.34452e-07	sca	0	0	NO
FBgn0003330	460.129	-0.30634	0.00310742	Sce	0	0	NO
FBgn0003334	1032.29	-0.0284651	0.790968	Scm	0	0	NO
FBgn0003345	1944.87	-1.32389	3.58738e-46	sd	1	1	YES
FBgn0003346	1849.9	0.198705	0.0122834	RanGAP	0	0	NO
FBgn0003353	285.386	-0.646486	9.21465e-08	sei	0	0	NO
FBgn0003357	0.679088	1.68064	0	Jon99Ciii	0	0	NO
FBgn0003360	36476.7	0.365865	8.05099e-07	sesB	2	4	YES
FBgn0003366	1224.55	-2.39737	7.25086e-35	sev	0	0	NO
FBgn0003371	2147.32	-0.44826	1.98714e-11	sgg	0	0	NO
FBgn0003380	6.0103	-3.72609	0.000119758	Sh	1	1	NO
FBgn0003386	168.987	-3.56022	5.9028e-58	Shaw	0	0	NO
FBgn0003388	88.5361	-2.36066	5.60691e-27	shd	0	0	NO
FBgn0003390	170.211	-1.72895	1.07544e-22	shf	0	0	NO
FBgn0003391	4207.54	-1.68114	1.34972e-61	shg	1	1	YES
FBgn0003392	2061.94	-0.0813073	0.264577	shi	0	0	NO
FBgn0003396	1044.83	-0.947621	3.52827e-25	shn	2	1	YES
FBgn0003401	1326.54	0.385132	1.29109e-05	shu	0	0	NO
FBgn0003410	786.09	0.0301313	0.774734	sina	1	0	NO
FBgn0003411	8.13356	6.2328	4.05322e-07	sisA	0	0	NO
FBgn0003415	1527.23	0.732331	3.37331e-21	skd	6	2	NO
FBgn0003416	689.848	-0.226361	0.028846	sl	0	0	NO
FBgn0003423	2298.55	-0.232662	0.0385925	slgA	1	3	YES
FBgn0003429	127.943	-3.7715	1.59384e-69	slo	0	0	NO
FBgn0003430	0.554429	-1.81824	0	slp1	0	0	NO
FBgn0003435	658.518	-0.642857	8.0886e-09	sm	2	3	YES
FBgn0003444	478.542	0.333913	0.00739725	smo	0	0	NO
FBgn0003447	1810.44	0.933698	4.31549e-23	sn	3	4	YES
FBgn0003449	1024.33	0.152592	0.0864401	snf	0	0	NO
FBgn0003450	88.47	9.67455	4.99299e-20	snk	1	2	YES
FBgn0003459	535.293	-0.288303	0.0092802	stwl	0	0	NO
FBgn0003460	225.697	-2.95423	3.18069e-68	so	0	0	NO
FBgn0003462	3569.91	0.168908	0.00326832	Sod1	1	2	YES
FBgn0003463	434.565	-3.08008	1.92813e-66	sog	0	0	NO
FBgn0003464	1362.29	0.290027	0.00104551	sol	1	2	YES
FBgn0003475	636.237	1.62864	7.63876e-56	spir	1	1	YES
FBgn0003479	224.233	-0.21507	0.086949	spn-A	0	0	NO
FBgn0003480	112.59	1.72111	7.07113e-22	spn-B	0	0	NO
FBgn0003482	25.8379	1.04517	0.00368725	spn-D	0	0	NO
FBgn0003483	1904.27	0.0715595	0.498181	spn-E	1	0	YES
FBgn0003486	323.727	-0.126055	0.783325	spo	0	0	NO
FBgn0003495	435.305	0.735461	1.0697e-11	spz	0	0	NO
FBgn0003499	55.019	-1.99454	1.53879e-11	sr	0	0	NO
FBgn0003502	1517.79	0.639749	6.37129e-11	Btk	5	6	YES
FBgn0003507	1262.19	0.0967611	0.783325	srp	1	1	YES
FBgn0003512	446.275	-0.1261	0.32574	Sry-delta	0	0	NO
FBgn0003514	2632.19	-0.999976	6.18912e-44	sqh	0	0	NO
FBgn0003515	16.8687	1.28027	0.0103269	st	0	0	NO
FBgn0003517	67175	0.0649311	0.418364	sta	1	0	YES
FBgn0003520	1455.26	0.450378	9.4725e-10	stau	0	0	NO
FBgn0003525	1713.71	1.50807	1.57952e-32	stg	1	1	YES
FBgn0003527	322.796	1.16358	1.82513e-18	stil	1	2	YES
FBgn0003545	364.408	0.672782	5.49891e-08	sub	0	0	NO
FBgn0003557	1842.25	-0.311558	0.00168103	Su(dx)	0	0	NO
FBgn0003559	901.8	-0.247683	0.00497813	su(f)	1	1	YES
FBgn0003567	1014.73	-0.314687	3.71018e-05	su(Hw)	0	0	NO
FBgn0003575	1156.84	-0.593174	3.28962e-10	su(sable)	1	1	NO
FBgn0003598	1088.56	0.191745	0.0508123	Su(var)3-7	0	0	NO
FBgn0003607	2642.69	-0.0804362	0.265046	Su(var)205	0	0	NO
FBgn0003612	1630.57	0.426189	2.57385e-11	Su(var)2-10	1	1	YES
FBgn0003638	1586.31	0.49216	1.08798e-05	su(w[a])	3	13	NO
FBgn0003651	2.20614	-4.05508	0.00646586	svp	0	0	NO
FBgn0003654	606.043	-0.1221	0.236489	sw	2	2	YES
FBgn0003655	1315.88	8.11308	7.97674e-201	swa	1	2	YES
FBgn0003656	2451.42	0.345339	0.00169478	sws	2	3	YES
FBgn0003660	2195.47	-0.757089	2.62038e-37	Syb	0	0	NO
FBgn0003676	7239.28	0.432404	1.75356e-06	CCT1	0	0	NO
FBgn0003687	352.768	0.33814	0.00128077	Tbp	0	0	NO
FBgn0003701	407.621	0.254201	0.097042	thr	0	0	NO
FBgn0003710	9.73644	-1.37414	0.0132903	tipE	2	4	YES
FBgn0003714	804.159	0.357158	0.000577388	tko	0	0	NO
FBgn0003716	1510.56	-0.446064	7.77958e-11	tkv	0	0	NO
FBgn0003719	7.65625	-0.782826	0.270671	tld	0	0	NO
FBgn0003721	8523.52	-1.21538	3.334e-103	Tm1	4	8	YES
FBgn0003731	1524.16	-1.5198	5.86304e-43	Egfr	0	0	NO
FBgn0003733	336.954	0.593589	2.89616e-07	tor	0	0	NO
FBgn0003741	206.816	-0.685893	3.34971e-08	tra	0	0	NO
FBgn0003742	592.203	0.723534	2.36532e-14	tra2	0	0	NO
FBgn0003744	1402.74	-0.059266	0.435315	trc	0	0	NO
FBgn0003747	1.8536	2.47338	0.0990008	Gr5a	0	0	NO
FBgn0003748	2260.02	0.078526	0.735973	Treh	3	2	YES
FBgn0003751	64.9409	1.71396	1.09332e-08	trk	1	2	YES
FBgn0003862	962.622	-0.305938	0.003684	trx	1	1	NO
FBgn0003866	152.523	-0.229541	0.345382	tsh	1	2	YES
FBgn0003867	108.925	-0.845789	0.00133191	tsl	0	0	NO
FBgn0003870	2092.62	0.0331332	0.67617	ttk	2	6	YES
FBgn0003882	790.739	0.317106	0.00265705	tub	0	0	NO
FBgn0003884	23093.6	-0.503018	2.25681e-07	alphaTub84B	1	0	NO
FBgn0003885	3158.7	0.276749	0.00329116	alphaTub84D	0	0	NO
FBgn0003890	792.245	-0.985287	2.43842e-22	betaTub97EF	0	0	NO
FBgn0003891	5113.42	-0.33092	4.49798e-06	tud	1	2	NO
FBgn0003892	317.426	-1.80655	6.55521e-41	ptc	1	2	NO
FBgn0003930	9.93672	-2.14614	0.0485144	snRNA:U4:39B	0	0	NO
FBgn0003931	2.31032	-4.04307	0.0604298	snRNA:U4:38AB	0	0	NO
FBgn0003934	1.74096	-1.65933	0.319694	snRNA:U5:23D	0	0	NO
FBgn0003935	2.55542	0.530929	0.671332	snRNA:U5:34A	0	0	NO
FBgn0003938	3.40295	-0.648338	0.556267	snRNA:U5:63BC	0	0	NO
FBgn0003941	23407.3	-0.0728875	0.404863	RpL40	0	0	NO
FBgn0003942	31306.3	0.0888388	0.350217	RpS27A	0	0	NO
FBgn0003943	965.736	-0.934269	0.0103489	Ubi-p63E	1	0	NO
FBgn0003944	2.278	-4.07472	0.00763658	Ubx	0	0	NO
FBgn0003950	65.2332	0.7331	0.00097984	unc	0	0	NO
FBgn0003963	1225.26	-1.58954	1.08661e-16	ush	3	4	NO
FBgn0003964	915.003	0.185574	0.0190961	usp	0	0	NO
FBgn0003965	1.11012	0.762866	0.723299	v	0	0	NO
FBgn0003969	1330.82	-0.438222	1.83992e-06	vap	0	0	NO
FBgn0003977	573.452	-0.794405	2.03233e-19	vir	0	0	NO
FBgn0003978	713.673	0.682895	3.05103e-11	vls	0	0	NO
FBgn0003979	15624	2.92922	5.30112e-06	Vm26Aa	0	0	NO
FBgn0003980	11472.2	2.09293	4.56951e-06	Vm26Ab	0	0	NO
FBgn0003983	6379.53	5.6679	1.28532e-33	Vm34Ca	0	0	NO
FBgn0003984	82.736	-2.74141	1.0511e-32	vn	0	0	NO
FBgn0003996	112.624	-1.72131	4.90223e-22	w	0	0	NO
FBgn0003997	541.198	-2.2058	4.29966e-08	hid	2	0	NO
FBgn0004003	304.661	-0.482675	0.255369	wbl	0	0	NO
FBgn0004034	64.4198	-1.08675	0.000767961	y	0	0	NO
FBgn0004045	36954.9	0.211927	0.622943	Yp1	0	0	NO
FBgn0004047	13587.4	1.20376	0.00154619	Yp3	0	0	NO
FBgn0004049	924.489	0.281491	0.000787784	yrt	0	0	NO
FBgn0004050	588.576	0.25175	0.0203752	z	0	0	NO
FBgn0004053	5.91189	5.02211	7.25193e-05	zen	0	0	NO
FBgn0004055	564.07	-1.8702	2.11205e-59	uzip	1	0	NO
FBgn0004057	428.183	-0.394996	1.64498e-05	Zw	0	0	NO
FBgn0004066	2891.06	0.455857	5.59621e-09	Prosalpha4	0	0	NO
FBgn0004087	452.612	0.0495759	0.702665	Dhfr	0	0	NO
FBgn0004101	426.988	0.114497	0.292028	bs	0	0	NO
FBgn0004103	6101.45	-0.0679702	0.373831	Pp1-87B	0	0	NO
FBgn0004106	1127.77	0.0200498	0.860168	Cdk1	0	0	NO
FBgn0004107	783.597	0.501449	5.4315e-10	Cdk2	0	0	NO
FBgn0004108	610.295	-1.17994	2.41409e-33	Nrt	1	0	NO
FBgn0004110	0.825237	0.156016	0.954204	tin	0	0	NO
FBgn0004117	4938.84	-3.59229	1.29939e-168	Tm2	0	0	NO
FBgn0004118	0.740152	-1.24204	0	nAChRbeta2	0	0	NO
FBgn0004132	587.797	0.316444	0.000567869	boca	0	0	NO
FBgn0004133	1064.34	-2.30628	8.15348e-30	blow	0	0	NO
FBgn0004167	3242.9	-1.31527	6.68649e-37	kst	1	1	NO
FBgn0004168	5.57664	-2.20904	0.0305498	5-HT1A	0	0	NO
FBgn0004169	6608.31	-3.55766	1.0172e-166	up	0	0	NO
FBgn0004177	7354	-0.11812	0.0594821	mts	1	1	NO
FBgn0004179	1604.5	-0.180576	0.00680336	Csp	0	0	NO
FBgn0004183	13.1184	0.00688714	0.992266	snRNA:U1:82Eb	0	0	NO
FBgn0004187	0.859701	0.0781187	0.974627	snRNA:U1:95Cc	0	0	NO
FBgn0004192	1.91142	1.48114	0.354758	snRNA:U2:34ABb	0	0	NO
FBgn0004197	8.79263	-6.8389	7.13375e-09	Ser	0	0	NO
FBgn0004198	1057.69	-2.11181	6.8092e-45	ct	0	0	NO
FBgn0004227	1413.33	-0.480043	4.3282e-09	nonA	2	2	NO
FBgn0004228	2.39368	2.05029	0.146902	mex1	0	0	NO
FBgn0004237	4335.49	0.161475	0.0469777	Hrb87F	0	0	NO
FBgn0004242	2.03035	-3.9339	0.0131723	Syt1	0	0	NO
FBgn0004359	347.21	0.0941815	0.494434	T48	3	3	YES
FBgn0004360	163.013	-2.17247	7.11876e-33	Wnt2	0	0	NO
FBgn0004362	10732.1	0.183422	0.0445606	HmgD	2	4	YES
FBgn0004363	13169.1	0.722499	9.94364e-16	porin	1	7	YES
FBgn0004367	392.636	0.124935	0.365263	mei-41	0	0	NO
FBgn0004368	1094.55	-0.370612	1.0587e-05	Ptp4E	2	7	YES
FBgn0004369	468.101	-0.483788	8.52698e-07	Ptp99A	0	0	NO
FBgn0004370	1686.91	-1.29795	3.04694e-27	Ptp10D	6	7	YES
FBgn0004372	0.987309	0.61258	0.770741	aly	0	0	NO
FBgn0004373	1830.46	-0.374105	3.03478e-05	fwd	1	1	YES
FBgn0004374	306.456	0.0993232	0.425789	neb	3	2	NO
FBgn0004378	870.584	-0.666316	8.66455e-08	Klp61F	0	0	NO
FBgn0004379	550.939	-0.145598	0.206624	Klp67A	0	0	NO
FBgn0004380	189.321	-0.531297	0.000471951	Klp64D	0	0	NO
FBgn0004381	270.096	0.358945	0.042046	Klp68D	0	0	NO
FBgn0004387	908.887	-0.379946	3.57787e-05	Klp98A	1	1	YES
FBgn0004390	1068.9	-0.0717449	0.55525	RasGAP1	0	0	NO
FBgn0004391	1081.23	0.149557	0.0977658	shtd	0	0	NO
FBgn0004394	0.705038	-2.21372	0	pdm2	1	1	NO
FBgn0004395	771.314	-0.362311	0.00355738	unk	1	1	NO
FBgn0004396	429.3	0.645816	0.00513416	CrebA	1	0	NO
FBgn0004397	2577.46	-1.2544	3.02868e-18	Vinc	0	0	NO
FBgn0004400	147.771	3.33589	6.21292e-62	rhi	1	1	YES
FBgn0004401	7117.62	-0.340825	2.96159e-07	Pep	1	1	NO
FBgn0004403	12867	-0.0226325	0.846983	RpS14a	0	0	NO
FBgn0004404	2440.62	0.166635	0.21298	RpS14b	0	0	NO
FBgn0004406	441.461	0.548837	2.19426e-08	PolG1	0	0	NO
FBgn0004419	17959.6	2.74237	2.44881e-146	me31B	1	3	YES
FBgn0004431	1.36445	-0.572296	0.777792	LysX	0	0	NO
FBgn0004432	24364.9	0.50119	1.15188e-09	Cyp1	1	0	NO
FBgn0004435	304.764	-1.57308	1.60931e-42	Galphaq	0	0	NO
FBgn0004436	1569.27	-0.175764	0.0225635	Ubc6	1	0	NO
FBgn0004449	947.85	-3.33945	1.08799e-257	Ten-m	0	0	NO
FBgn0004456	2013.74	-1.94093	6.9302e-89	mew	1	1	NO
FBgn0004463	667.762	0.201163	0.0476379	Polr3B	0	0	NO
FBgn0004465	955.026	0.548896	3.49507e-14	Su(P)	0	0	NO
FBgn0004507	4671.68	0.829656	5.65019e-25	GlyP	0	0	NO
FBgn0004509	1335.21	-0.718921	2.98823e-14	Fur1	1	0	NO
FBgn0004510	369.184	0.491384	2.324e-06	Ets97D	0	0	NO
FBgn0004511	2.14943	-4.73843	0.00310392	dy	0	0	NO
FBgn0004512	71.3678	-2.34293	1.96606e-09	Mdr49	0	0	NO
FBgn0004513	25.7147	-3.30569	9.1503e-11	Mdr65	0	0	NO
FBgn0004514	88.1335	-2.83033	1.49868e-32	Oct-TyrR	0	0	NO
FBgn0004552	3.61226	-2.59673	0.0138472	Akh	0	0	NO
FBgn0004556	736.986	1.04487	1.53557e-18	Dbp73D	0	0	NO
FBgn0004569	177.716	-2.09958	8.6893e-35	aos	0	0	NO
FBgn0004573	6.51242	-1.90604	0.00651227	5-HT7	0	0	NO
FBgn0004574	1144.81	-0.917292	3.1559e-20	Rop	0	0	NO
FBgn0004575	28.2178	-1.55026	4.65053e-06	Syn	0	0	NO
FBgn0004580	17.747	-7.08692	2.2903e-10	Cbp53E	0	0	NO
FBgn0004581	35.823	-0.254657	0.467672	bgcn	1	0	NO
FBgn0004583	807.82	-0.823478	5.90238e-21	ex	0	0	NO
FBgn0004584	1185.07	0.014639	0.906371	Rrp1	0	0	NO
FBgn0004587	4835.47	-0.0170774	0.850901	B52	1	2	YES
FBgn0004595	1.0305	-2.77298	0.213915	pros	0	0	NO
FBgn0004597	273.555	0.0286927	0.826875	CycC	0	0	NO
FBgn0004598	2782.33	0.71352	7.88314e-19	Fur2	1	2	NO
FBgn0004606	1235	-1.94975	6.22127e-104	zfh1	1	3	YES
FBgn0004607	63.7312	-3.17012	8.30154e-32	zfh2	1	1	NO
FBgn0004611	1023.05	-0.965638	1.91346e-40	Plc21C	2	0	NO
FBgn0004620	65.5631	-4.05101	2.60806e-30	GluRIIA	0	0	NO
FBgn0004622	11.0478	-4.04663	6.75888e-06	TkR99D	0	0	NO
FBgn0004629	314.505	-1.02879	2.82616e-06	Cys	0	0	NO
FBgn0004635	16.0741	-0.695925	0.172788	rho	0	0	NO
FBgn0004636	2956.52	-0.428994	2.12633e-10	Rap1	0	0	NO
FBgn0004638	1585.65	-0.833772	3.29259e-41	drk	0	0	NO
FBgn0004643	1154.05	0.612253	6.56267e-15	Zw10	0	0	NO
FBgn0004644	27.167	-1.41944	4.72203e-05	hh	0	0	NO
FBgn0004646	3338.81	-1.11713	1.10018e-50	ogre	1	1	NO
FBgn0004647	2095.18	-1.52748	3.00643e-52	N	1	0	NO
FBgn0004648	1990.44	0.108092	0.304118	svr	1	1	YES
FBgn0004649	10612.1	7.53899	0	yl	1	3	YES
FBgn0004650	1783.71	9.35212	5.78507e-167	fs(1)N	1	6	YES
FBgn0004652	553.606	-1.33931	6.55267e-13	fru	2	9	NO
FBgn0004654	3040.02	-0.00784739	0.952894	Pgd	0	0	NO
FBgn0004655	1420.39	0.791398	6.29244e-19	wapl	1	0	YES
FBgn0004656	3556.55	-0.452785	4.41675e-13	fs(1)h	3	5	NO
FBgn0004657	3738.23	-1.17341	1.31976e-13	mys	2	1	NO
FBgn0004666	1229.31	-1.93718	2.00079e-08	sim	0	0	NO
FBgn0004687	5076.43	-0.847737	3.93735e-33	Mlc-c	0	0	NO
FBgn0004698	1933.2	0.449558	1.21689e-06	Xpc	0	0	NO
FBgn0004777	51.7134	-3.90201	2.17682e-30	Ccp84Ag	0	0	NO
FBgn0004778	0.629254	-3.04984	0	Ccp84Af	0	0	NO
FBgn0004795	1102.82	5.38053	2.27335e-38	retn	1	2	YES
FBgn0004797	400.838	1.83599	3.3874e-30	mdy	1	1	YES
FBgn0004811	498.979	-0.076716	0.44189	fs(2)ltoPP43	0	0	NO
FBgn0004828	10804.8	-0.25978	1.49213e-05	His3.3B	2	1	YES
FBgn0004832	371.763	0.712953	1.74062e-09	Xpac	1	2	YES
FBgn0004837	185.479	-0.0481945	0.757651	Su(H)	0	0	NO
FBgn0004838	21994.8	0.431195	1.20015e-06	Hrb27C	1	1	NO
FBgn0004839	124.66	-2.35208	1.88751e-38	otk	0	0	NO
FBgn0004841	0.818867	-0.955264	0.696542	TkR86C	0	0	NO
FBgn0004852	179.378	-1.80631	1.53808e-20	Ac76E	0	0	NO
FBgn0004855	476.763	0.419978	6.41489e-06	Polr2I	0	0	NO
FBgn0004856	1503.37	0.11494	0.0792831	Bx42	0	0	NO
FBgn0004858	486.977	-2.15873	1.181e-64	elB	1	1	NO
FBgn0004859	1757.68	-1.78316	2.08892e-78	ci	0	0	NO
FBgn0004860	366.953	-0.564597	5.36344e-06	ph-d	1	1	YES
FBgn0004861	320.275	-1.41357	1.12723e-29	ph-p	2	3	YES
FBgn0004864	1255.38	-1.0975	3.17273e-22	hop	0	0	NO
FBgn0004865	19.9307	0.0428468	0.940177	Eip78C	1	8	NO
FBgn0004867	48656.6	0.222109	0.00261111	RpS2	0	0	NO
FBgn0004868	6332.59	0.142268	0.0590809	Gdi	1	0	NO
FBgn0004870	34.5848	-2.60568	3.2491e-14	bab1	0	0	NO
FBgn0004872	4711.54	0.920804	1.12742e-19	piwi	1	4	YES
FBgn0004875	2468.36	-0.110074	0.164358	enc	1	1	NO
FBgn0004876	886.936	1.22406	6.03271e-33	cdi	1	1	YES
FBgn0004878	293.795	-2.55906	2.82237e-42	cas	0	0	NO
FBgn0004882	5289.71	2.4446	6.51357e-138	orb	1	3	YES
FBgn0004885	237.836	-1.67764	4.44882e-14	tok	0	0	NO
FBgn0004888	4052.18	0.426154	7.24813e-10	Scsalpha1	1	1	YES
FBgn0004889	3054.41	0.695106	5.88713e-28	tws	3	4	YES
FBgn0004892	9.45429	-2.72555	0.00020055	sob	0	0	NO
FBgn0004893	741.758	-1.86344	1.23524e-55	bowl	0	0	NO
FBgn0004901	1582.09	0.540145	3.13829e-10	Prat	0	0	NO
FBgn0004903	762.843	-0.0914742	0.547305	Rb97D	0	0	NO
FBgn0004907	15925.9	-0.939803	9.37356e-31	14-3-3zeta	1	2	YES
FBgn0004908	213.585	0.143073	0.343945	Arl2	0	0	NO
FBgn0004910	125.401	-2.42119	2.89535e-31	Eip63F-1	2	2	YES
FBgn0004913	1704.88	0.247517	0.0012218	Gnf1	0	0	NO
FBgn0004914	1648.07	-1.42735	8.41039e-26	Hnf4	1	1	YES
FBgn0004915	721.244	-0.199587	0.0291833	TfIIB	0	0	NO
FBgn0004919	40.561	-2.36086	8.31799e-12	gol	1	6	NO
FBgn0004921	3567.92	-0.864999	3.04623e-40	Ggamma1	0	0	NO
FBgn0004924	4833.95	0.843543	3.69502e-59	Top1	1	1	YES
FBgn0004926	4046.13	0.609796	1.13003e-09	eIF2beta	0	0	NO
FBgn0004956	77.9892	-0.994439	0.000929785	upd1	0	0	NO
FBgn0004957	127.303	0.149331	0.402175	por	1	0	YES
FBgn0004959	275.963	-1.21232	3.03062e-12	phm	0	0	NO
FBgn0005198	941.575	-0.522222	2.02977e-07	gig	0	0	NO
FBgn0005278	19617.7	-0.835275	5.50934e-20	Sam-S	1	2	NO
FBgn0005322	887.609	0.295625	0.00276117	nmd	0	0	NO
FBgn0005355	651.303	-0.280188	0.000666385	Su(fu)	0	0	NO
FBgn0005386	678.329	0.0908722	0.388445	ash1	0	0	NO
FBgn0005390	2288.56	7.97052	0	fs(1)M3	1	5	YES
FBgn0005391	43930.1	1.31543	0.000110799	Yp2	0	0	NO
FBgn0005411	2246.73	-0.0728564	0.48654	U2af50	0	0	NO
FBgn0005427	826.5	0.810481	1.02985e-23	ewg	1	3	YES
FBgn0005533	26495.1	0.00504966	0.964882	RpS17	0	0	NO
FBgn0005536	1823.89	-1.43945	2.99088e-83	Mbs	1	1	NO
FBgn0005558	7.60445	-1.92127	0.00646902	ey	0	0	NO
FBgn0005561	2.98051	1.24931	0.321258	sv	1	2	YES
FBgn0005564	85.6449	-1.78467	1.19716e-16	Shal	1	1	NO
FBgn0005585	10303.1	0.0436571	0.783622	Calr	1	1	NO
FBgn0005586	4.33001	-0.234618	0.841564	Rab3	0	0	NO
FBgn0005593	38697.7	0.0675279	0.384929	RpL7	0	0	NO
FBgn0005596	876.634	1.15898	1.37461e-38	yem	0	0	NO
FBgn0005612	2111.93	-1.76895	6.95345e-09	Sox14	0	0	NO
FBgn0005614	48.936	-3.76903	7.15448e-28	trpl	0	0	NO
FBgn0005616	104.538	-0.753468	2.04702e-05	msl-2	0	0	NO
FBgn0005617	922.882	1.06159	1.65958e-20	msl-1	0	0	NO
FBgn0005619	0.717782	0.615448	0	Hdc	1	0	NO
FBgn0005624	440.197	-0.55317	2.06965e-05	Psc	1	0	NO
FBgn0005626	5.30852	-4.00448	0.00033393	ple	0	0	NO
FBgn0005631	345	-2.46164	6.4145e-85	robo1	0	0	NO
FBgn0005632	3739.41	-0.426824	1.77273e-09	faf	1	1	YES
FBgn0005633	3.4469	0.757376	0.701031	fln	0	0	NO
FBgn0005636	31.9078	-3.12299	1.96603e-16	nvy	0	0	NO
FBgn0005638	48.6981	0.431473	0.45323	slbo	1	2	YES
FBgn0005640	804.1	0.0561876	0.645591	Eip63E	0	0	NO
FBgn0005642	798.256	-0.248594	0.00636762	wdn	0	0	NO
FBgn0005648	2602.81	0.589566	5.65558e-05	Pabp2	1	0	NO
FBgn0005649	3413.25	-0.0896518	0.154012	Rox8	0	0	NO
FBgn0005655	2580.21	0.16801	0.00595144	PCNA	0	0	NO
FBgn0005659	3.49338	-4.72973	0.000407072	Ets98B	0	0	NO
FBgn0005660	30.027	-0.00994543	0.98709	Ets21C	0	0	NO
FBgn0005666	7445.51	-4.68252	7.42351e-172	bt	2	1	NO
FBgn0005671	7616.62	0.248284	0.000773513	Vha55	0	0	NO
FBgn0005672	729.835	-0.643027	2.55747e-12	spi	3	4	YES
FBgn0005674	2974.57	0.205176	0.0194906	GluProRS	0	0	NO
FBgn0005677	1.07444	-1.23098	0.544845	dac	1	2	YES
FBgn0005683	152.446	1.86067	5.04075e-17	pie	0	0	NO
FBgn0005694	1307.67	1.12771	1.85828e-40	Aef1	1	0	YES
FBgn0005695	1357.89	2.03838	3.27252e-158	gcl	1	2	YES
FBgn0005696	563.439	0.34058	0.000186121	PolA2	0	0	NO
FBgn0005771	488.933	-1.91015	1.05192e-79	noc	0	0	NO
FBgn0005775	95.1223	-3.14698	2.91578e-32	Con	1	1	YES
FBgn0005777	1583.04	0.627306	7.34778e-11	PpD3	0	0	NO
FBgn0008635	2691.73	-0.366053	3.68473e-07	betaCOP	0	0	NO
FBgn0010014	9.99108	0.381028	0.536294	CanB	1	1	YES
FBgn0010015	9.12843	-2.82248	6.68814e-05	CanA1	0	0	NO
FBgn0010019	195.262	-3.83797	0	Cyp4g1	0	0	NO
FBgn0010038	152.483	-0.870613	0.374965	GstD2	0	0	NO
FBgn0010039	334.25	-0.765488	1.07049e-05	GstD3	0	0	NO
FBgn0010040	3.32273	1.03811	0.359041	GstD4	0	0	NO
FBgn0010041	5.67646	-1.28459	0.0967047	GstD5	0	0	NO
FBgn0010042	0.783233	-0.427175	0	GstD6	0	0	NO
FBgn0010051	1608.2	-1.25648	1.12865e-24	Itpr	1	2	YES
FBgn0010052	1.5819	-2.66635	0.102602	Jhe	0	0	NO
FBgn0010053	584.186	-1.57162	1.52147e-44	Jheh1	0	0	NO
FBgn0010078	35985.8	0.0767467	0.298924	RpL23	0	0	NO
FBgn0010097	646.14	5.22124	2.48934e-166	gammaTub37C	1	2	YES
FBgn0010100	5203.76	0.157596	0.0903248	mAcon1	0	0	NO
FBgn0010105	13.2735	-3.10083	4.03246e-07	comm	0	0	NO
FBgn0010109	10.1911	-0.612822	0.304742	dpn	0	0	NO
FBgn0010113	1554.36	-1.27711	1.13424e-34	hdc	4	3	YES
FBgn0010114	6.55777	-0.659396	0.413048	hig	0	0	NO
FBgn0010173	2646.29	0.117132	0.152992	RPA1	0	0	NO
FBgn0010194	280.658	-0.50469	5.22772e-05	Wnt5	0	0	NO
FBgn0010198	23013.5	0.0782725	0.43152	RpS15Aa	0	0	NO
FBgn0010213	2040.18	-0.0598945	0.396652	Sod2	0	0	NO
FBgn0010215	2636.16	-1.27045	1.41422e-77	alpha-Cat	0	0	NO
FBgn0010217	26473	0.251652	0.000618344	ATPsynbeta	0	0	NO
FBgn0010220	743	0.523902	4.16988e-11	Dbp45A	0	0	NO
FBgn0010222	970.11	-0.676663	5.17638e-08	Nmdmc	0	0	NO
FBgn0010223	25.1735	2.48854	1.46526e-07	Galphaf	1	1	YES
FBgn0010225	771.867	-1.98833	1.23375e-84	Gel	0	0	NO
FBgn0010226	3318.6	-0.51401	1.19756e-10	GstS1	1	2	YES
FBgn0010228	3361.06	-0.560484	0.00028357	HmgZ	1	1	NO
FBgn0010235	1684.69	-0.674309	6.29979e-27	Klc	0	0	NO
FBgn0010238	1249.25	-2.65173	7.52553e-64	Lac	0	0	NO
FBgn0010241	1.18721	-2.2401	0.20609	Mdr50	0	0	NO
FBgn0010246	1984	-2.08186	4.7939e-88	Myo61F	1	2	YES
FBgn0010247	3201.09	-0.383726	7.89447e-06	Parp	8	59	NO
FBgn0010258	10.5783	-1.23714	0.0457678	Rbp4	0	0	NO
FBgn0010263	688.518	-2.7009	7.77412e-59	Rbp9	1	6	YES
FBgn0010265	33005.6	0.189979	0.00175009	RpS13	0	0	NO
FBgn0010269	712.034	0.696241	5.38682e-17	Dsor1	1	2	YES
FBgn0010278	2555.56	0.25198	0.00660245	Ssrp	0	0	NO
FBgn0010280	1775.4	-0.0665213	0.488255	Taf4	0	0	NO
FBgn0010282	1633.21	0.97227	2.34846e-23	TfIIFalpha	1	0	YES
FBgn0010287	106.122	0.168834	0.405542	Trf	0	0	NO
FBgn0010288	2258.81	0.624642	2.72128e-12	Uch	0	0	NO
FBgn0010292	1217.69	0.832852	5.58048e-22	bys	0	0	NO
FBgn0010300	1829.37	0.600569	5.19085e-14	brat	5	3	NO
FBgn0010303	1185.65	-0.0330325	0.728321	hep	2	0	NO
FBgn0010309	368.177	1.67499	6.96675e-55	pigeon	1	2	YES
FBgn0010313	1703.97	0.26815	9.30037e-05	corto	1	2	YES
FBgn0010314	393.821	1.13834	3.10716e-16	Cks30A	0	0	NO
FBgn0010315	808.243	0.413631	5.07245e-07	CycD	0	0	NO
FBgn0010316	1076.11	-0.359173	7.78983e-08	dap	0	0	NO
FBgn0010317	532.895	3.82707	1.35939e-144	CycJ	1	1	YES
FBgn0010323	2.29474	-0.848351	0.513209	Gsc	0	0	NO
FBgn0010328	4151.21	0.197609	0.000104505	woc	1	1	YES
FBgn0010329	5.27846	-1.80475	0.0353903	Tbh	2	3	YES
FBgn0010333	2297.99	-0.320379	5.55241e-07	Rac1	0	0	NO
FBgn0010339	1381.71	0.576887	3.68473e-07	128up	0	0	NO
FBgn0010340	235.884	0.412726	0.00863308	140up	0	0	NO
FBgn0010341	3995.67	0.0388354	0.620434	Cdc42	0	0	NO
FBgn0010342	762.467	0.479499	2.88162e-06	Map60	1	1	YES
FBgn0010348	7408.37	-0.0647958	0.543561	Arf1	0	0	NO
FBgn0010350	763.882	-0.698869	6.92684e-09	Cds	0	0	NO
FBgn0010352	2898.87	-0.229167	0.000481866	Ogdh	0	0	NO
FBgn0010355	1364.64	-0.579094	8.04865e-19	Taf1	0	0	NO
FBgn0010356	420.66	-0.037672	0.727415	Taf5	0	0	NO
FBgn0010379	2215.2	-0.0787333	0.219494	Akt	1	2	YES
FBgn0010380	2139.4	-0.28655	0.000166884	AP-1-2beta	0	0	NO
FBgn0010382	1006.91	0.839926	3.10569e-12	CycE	1	3	YES
FBgn0010383	2289.4	-2.57998	2.86678e-44	Cyp18a1	0	0	NO
FBgn0010387	23.018	-2.09409	1.073e-07	Acbp2	0	0	NO
FBgn0010388	23.7284	-1.21538	0.020829	Dro	0	0	NO
FBgn0010389	1066.82	-4.14814	5.59392e-280	htl	1	1	YES
FBgn0010391	2019.09	0.147578	0.11959	SrpRalpha	0	0	NO
FBgn0010395	162.416	-3.78598	1.39366e-58	Itgbn	1	1	YES
FBgn0010397	1221.02	-1.14856	2.92205e-26	LamC	0	0	NO
FBgn0010398	164.733	0.525274	0.000142633	Lrr47	0	0	NO
FBgn0010399	7.82329	-4.55528	8.54093e-06	Nmdar1	1	2	NO
FBgn0010401	5.67144	0.97992	0.330597	Os-C	0	0	NO
FBgn0010403	0.6733	0.178107	0	Obp83b	0	0	NO
FBgn0010406	1288.89	-0.585564	2.29227e-06	RNaseX25	0	0	NO
FBgn0010407	5.40317	-0.660171	0.429875	Ror	0	0	NO
FBgn0010408	26441.6	-0.0411228	0.714203	RpS9	0	0	NO
FBgn0010409	28914.2	0.126405	0.118744	RpL18A	0	0	NO
FBgn0010411	24980.9	0.0150514	0.880074	RpS18	1	2	YES
FBgn0010412	23182.5	0.14072	0.100768	RpS19a	0	0	NO
FBgn0010414	0.686371	-3.08277	0	SerT	0	0	NO
FBgn0010415	4170.5	-0.9292	6.0709e-46	Sdc	1	0	NO
FBgn0010416	1113.99	-0.208316	0.00311038	TH1	0	0	NO
FBgn0010417	836.573	0.0286831	0.802543	Taf6	0	0	NO
FBgn0010421	693.191	1.3704	1.12884e-31	TfIIFbeta	1	1	YES
FBgn0010422	1106.29	0.0770833	0.417027	TfIIS	0	0	NO
FBgn0010423	240.85	-2.65803	3.28969e-53	TpnC47D	0	0	NO
FBgn0010424	2582.88	-3.77793	4.70062e-135	TpnC73F	0	0	NO
FBgn0010431	733.48	6.40545	5.12918e-173	mtrm	1	3	YES
FBgn0010434	4817.25	-2.77154	1.62074e-155	cora	1	1	NO
FBgn0010435	1476.73	-2.545	1.21854e-12	emp	0	0	NO
FBgn0010438	1188.22	0.810118	1.14113e-29	mtSSB	0	0	NO
FBgn0010441	427.427	-0.282492	0.00239812	pll	0	0	NO
FBgn0010452	121.153	-1.23755	3.81702e-08	trn	0	0	NO
FBgn0010453	181.017	-2.00567	1.88564e-40	Wnt4	0	0	NO
FBgn0010470	1371.26	-0.0845512	0.439746	Fkbp14	1	1	YES
FBgn0010473	463.753	-2.30669	2.515e-52	tutl	0	0	NO
FBgn0010482	683.165	-3.5383	8.24324e-177	hlk	0	0	NO
FBgn0010488	10506	-0.0875841	0.0629487	NAT1	0	0	NO
FBgn0010497	392.4	4.55063	7.41482e-159	dmGlut	1	3	YES
FBgn0010501	1373.67	0.853568	4.82255e-29	Dcp-1	0	0	NO
FBgn0010504	236.997	-0.195249	0.21369	kermit	1	1	NO
FBgn0010516	2720.09	-0.100135	0.246702	wal	0	0	NO
FBgn0010520	444.133	0.748727	2.03079e-09	Bka	0	0	NO
FBgn0010531	266.428	0.400916	0.000504517	Ccs	0	0	NO
FBgn0010548	1272	-0.753511	3.79629e-15	Aldh-III	1	2	YES
FBgn0010549	148.318	2.30607	4.66742e-27	l(2)03659	0	0	NO
FBgn0010551	4868.72	0.548005	7.71752e-08	Phb2	0	0	NO
FBgn0010583	970.461	-0.284296	0.000870489	dock	0	0	NO
FBgn0010590	2159.43	0.169387	0.0177945	Prosbeta1	0	0	NO
FBgn0010591	1027.82	-0.284509	0.0870484	Sply	0	0	NO
FBgn0010602	2541.89	0.08948	0.201432	lwr	2	3	YES
FBgn0010607	303.11	0.317539	0.0371346	l(2)05714	0	0	NO
FBgn0010611	2491.29	-0.780577	4.31077e-07	Hmgs	1	1	YES
FBgn0010612	2779.55	0.032452	0.656196	ATPsynG	0	0	NO
FBgn0010620	1300.73	-0.256023	0.118001	CG10939	2	2	YES
FBgn0010621	7501.85	0.606086	3.95188e-11	CCT5	1	4	YES
FBgn0010622	324.022	-0.195003	0.161426	DCTN3-p24	0	0	NO
FBgn0010638	2674.46	0.167895	0.336244	Sec61beta	0	0	NO
FBgn0010651	684.611	-1.3207	1.54549e-09	MFS14	0	0	NO
FBgn0010660	1864.98	-0.512948	3.9304e-10	Nup214	0	0	NO
FBgn0010741	1822.22	0.709624	4.99736e-17	Pfdn2	1	2	YES
FBgn0010747	1298.57	0.0695861	0.52392	Srp54k	0	0	NO
FBgn0010750	949.168	0.0528423	0.517873	atms	0	0	NO
FBgn0010762	927.649	-0.397812	5.02562e-07	simj	3	3	NO
FBgn0010768	321.518	0.26206	0.0451191	sqz	1	1	YES
FBgn0010770	768.433	0.980356	7.77173e-25	ppan	0	0	NO
FBgn0010772	745.136	0.0193717	0.862851	Xe7	0	0	NO
FBgn0010774	4179.37	-0.0099825	0.92362	Ref1	0	0	NO
FBgn0010786	1370.63	0.906997	1.5318e-25	l(3)02640	1	2	YES
FBgn0010803	1089.98	0.850002	5.77621e-13	TrpRS	0	0	NO
FBgn0010808	1118.57	0.153003	0.0529441	Chchd3	0	0	NO
FBgn0010825	2160.96	-0.389515	1.999e-09	Gug	1	1	NO
FBgn0010830	523.57	0.486116	1.19284e-07	l(3)04053	0	0	NO
FBgn0010877	1139.53	0.15561	0.211529	l(3)05822	1	2	YES
FBgn0010894	351.981	-1.46118	8.00188e-23	sinu	0	0	NO
FBgn0010905	1865.89	0.277628	0.0390382	Spn	1	3	YES
FBgn0010909	4128.27	-0.476028	6.85444e-09	msn	1	1	NO
FBgn0010926	1355.24	0.705116	9.09389e-14	l(3)07882	0	0	NO
FBgn0011016	2063.28	0.62113	6.79613e-05	SsRbeta	0	0	NO
FBgn0011020	370.807	0.0139672	0.936746	Sas-4	0	0	NO
FBgn0011202	1083.6	-0.373364	0.000776057	dia	0	0	NO
FBgn0011204	3042.14	0.819345	9.2702e-21	cue	1	3	YES
FBgn0011205	1131.22	-0.929432	2.73753e-22	fbl	0	0	NO
FBgn0011206	182.237	0.0088935	0.959316	bol	3	5	NO
FBgn0011207	1018.63	0.479477	1.61091e-07	pelo	0	0	NO
FBgn0011211	19222.3	0.32937	3.57787e-05	blw	0	0	NO
FBgn0011217	9974.7	0.132951	0.142494	eff	2	3	YES
FBgn0011224	2875.1	0.0134933	0.899324	heph	2	14	YES
FBgn0011225	2686.29	-0.798193	1.71899e-16	jar	1	0	YES
FBgn0011227	661.395	-0.290638	0.00708954	ox	0	0	NO
FBgn0011230	4780.68	-1.33718	1.94543e-49	poe	0	0	NO
FBgn0011232	521.293	0.454451	8.79165e-05	scat	0	0	NO
FBgn0011236	919.183	-0.11219	0.345382	ken	2	3	NO
FBgn0011259	294.994	-1.46101	1.39453e-31	Sema1a	1	2	NO
FBgn0011260	2644.45	-0.299383	2.52395e-06	Sema2a	1	3	YES
FBgn0011272	33351.5	0.238231	0.000870489	RpL13	0	0	NO
FBgn0011274	959.709	-4.67737	4.35834e-230	Dif	0	0	NO
FBgn0011280	3.02774	-0.518082	0.658477	Obp19d	0	0	NO
FBgn0011284	39936.2	0.195735	0.0142751	RpS4	0	0	NO
FBgn0011286	862.684	-4.73267	4.98003e-239	RyR	0	0	NO
FBgn0011288	4.54176	-1.99763	0.0565217	Snap25	0	0	NO
FBgn0011289	1086.2	0.00522638	0.961238	TfIIA-L	0	0	NO
FBgn0011290	680.621	0.121462	0.221449	Taf12	1	0	NO
FBgn0011291	210.207	0.657146	2.3589e-06	Taf11	0	0	NO
FBgn0011296	398.546	-3.24545	3.2471e-75	l(2)efl	0	0	NO
FBgn0011297	374.636	0.230484	0.0190759	Alg3	1	2	NO
FBgn0011300	1275.51	0.114623	0.124666	babo	0	0	NO
FBgn0011305	746.24	-0.648078	5.98051e-14	Rsf1	0	0	NO
FBgn0011327	1586.18	0.626322	1.67327e-12	Uch-L5	0	0	NO
FBgn0011335	440.658	0.177083	0.0916409	vers	0	0	NO
FBgn0011336	2400.25	0.0402942	0.753807	Stt3B	0	0	NO
FBgn0011361	2246.25	0.586036	2.15827e-13	ND-ACP	1	1	YES
FBgn0011455	1954.22	0.108046	0.068724	ND-SGDH	0	0	NO
FBgn0011474	1201.64	0.527609	1.91147e-09	PR-Set7	0	0	NO
FBgn0011476	142.371	0.754092	2.91202e-07	l(3)neo43	0	0	NO
FBgn0011481	2061.45	0.800637	1.66665e-15	Ssdp	2	1	NO
FBgn0011509	585.28	0.945715	2.47865e-17	SrpRbeta	0	0	NO
FBgn0011559	0.749266	-2.27784	0	Acp36DE	0	0	NO
FBgn0011566	358.92	0.629574	4.10182e-09	Smyd3	0	0	NO
FBgn0011569	0.629254	-3.04984	0	can	0	0	NO
FBgn0011570	1467.6	-0.187396	0.033385	cpb	0	0	NO
FBgn0011573	1444.62	0.0624524	0.380054	Cdc37	0	0	NO
FBgn0011576	25.4218	-1.90647	0.00031281	Cyp4d2	0	0	NO
FBgn0011581	16.2681	-6.1569	0.00608497	Ms	0	0	NO
FBgn0011584	1671.15	-0.286628	0.000604952	Trp1	0	0	NO
FBgn0011586	1395.5	0.424221	7.09678e-06	e(r)	1	1	YES
FBgn0011589	25.3558	-5.30521	3.76213e-15	Elk	0	0	NO
FBgn0011591	740.163	-1.63316	4.50783e-78	fng	0	0	NO
FBgn0011592	1430.9	-0.89413	7.65036e-43	fra	0	0	NO
FBgn0011603	71.9013	-4.71881	5.91238e-39	ine	0	0	NO
FBgn0011604	1655.7	-0.334337	1.64016e-07	Iswi	1	2	YES
FBgn0011606	1044.16	0.0152453	0.896437	Klp3A	0	0	NO
FBgn0011638	4512.95	0.646343	1.14997e-09	La	0	0	NO
FBgn0011640	3237.04	-0.0568379	0.5423	lark	0	0	NO
FBgn0011642	913.094	-0.833305	2.9316e-11	Zyx	1	1	NO
FBgn0011648	1099.73	0.0751	0.38011	Mad	1	1	NO
FBgn0011655	867.308	-0.375113	0.000232079	Med	0	0	NO
FBgn0011656	802.244	-1.50866	1.22337e-42	Mef2	3	5	NO
FBgn0011659	353.997	0.274134	0.0315531	Mlh1	0	0	NO
FBgn0011660	281.946	0.0850943	0.648506	Pms2	0	0	NO
FBgn0011661	10705.3	-0.332135	3.06989e-06	Moe	4	6	YES
FBgn0011666	1207.25	0.318882	4.06573e-05	msi	3	1	YES
FBgn0011672	1291.61	-0.1783	0.185464	Mvl	1	2	YES
FBgn0011674	533.124	-0.539529	2.90876e-05	insc	1	2	YES
FBgn0011676	81.4144	-2.70883	1.06104e-24	Nos	0	0	NO
FBgn0011692	1711.72	0.081872	0.261151	pav	0	0	NO
FBgn0011695	273.802	-3.57063	4.98107e-64	EbpIII	0	0	NO
FBgn0011701	1.89292	-3.82125	0.0173816	repo	0	0	NO
FBgn0011703	2474.17	0.669319	2.18651e-19	RnrL	0	0	NO
FBgn0011704	2968.87	0.383734	0.000120182	RnrS	1	0	YES
FBgn0011705	585.538	2.22388	6.96458e-41	rost	1	1	YES
FBgn0011706	31.0297	-2.99646	1.37909e-13	rpr	0	0	NO
FBgn0011708	1053.09	0.0755916	0.284926	Syx5	0	0	NO
FBgn0011710	2035.4	-0.532537	2.4323e-10	Septin1	0	0	NO
FBgn0011715	774.394	0.0382341	0.728532	Snr1	0	0	NO
FBgn0011722	89.4462	-2.84942	2.7439e-29	Tig	0	0	NO
FBgn0011725	2005.22	0.283702	3.85593e-07	twin	4	3	YES
FBgn0011726	10252	-0.171335	0.00156618	tsr	1	3	NO
FBgn0011737	614.081	-0.372919	9.26491e-06	Wee1	0	0	NO
FBgn0011739	1008.34	-0.196243	0.0338379	wts	0	0	NO
FBgn0011740	452.184	-0.227437	0.121814	alpha-Man-IIa	1	3	YES
FBgn0011741	596.538	0.0182942	0.859021	Arp6	0	0	NO
FBgn0011742	2514.16	0.927704	1.2789e-52	Arp2	1	2	NO
FBgn0011745	1649.65	-0.0365536	0.616428	Arp1	0	0	NO
FBgn0011746	1546.88	-3.4128	4.3758e-30	ana	0	0	NO
FBgn0011747	5168.05	-1.19676	1.37327e-109	Ank	0	0	NO
FBgn0011754	1303.15	0.0840666	0.407887	PhKgamma	0	0	NO
FBgn0011760	5437.88	0.157969	0.146537	ctp	3	9	YES
FBgn0011761	6499.94	3.31677	3.32853e-129	dhd	0	0	NO
FBgn0011762	239.309	0.00429206	0.984559	Prim1	0	0	NO
FBgn0011763	2552.43	0.312136	6.51988e-07	Dp	0	0	NO
FBgn0011766	2361.19	0.0253961	0.726772	E2f1	3	6	YES
FBgn0011768	3530.97	0.420245	1.73063e-08	Fdh	0	0	NO
FBgn0011769	174.554	0.907372	1.5661e-11	Fdx1	0	0	NO
FBgn0011770	834.727	0.582991	2.14989e-14	Gip	0	0	NO
FBgn0011771	1083.6	-1.0503	1.9803e-43	Hem	0	0	NO
FBgn0011774	342.553	0.683174	1.34918e-05	Irbp	0	0	NO
FBgn0011785	1778.93	-0.0770347	0.35876	BRWD3	0	0	NO
FBgn0011787	1128.9	0.963757	2.22897e-18	mRpL12	0	0	NO
FBgn0011802	413.629	0.822485	1.53879e-11	Gem3	0	0	NO
FBgn0011812	1.04048	-1.97245	0.336667	Lcp1Psi	0	0	NO
FBgn0011817	1172.99	-0.284241	0.00221641	nmo	4	3	NO
FBgn0011818	813.955	0.839345	3.66896e-24	oaf	1	2	NO
FBgn0011824	1691.75	0.596907	5.42418e-14	CG4038	0	0	NO
FBgn0011826	1968.58	0.986782	5.99124e-32	Pp2B-14D	0	0	NO
FBgn0011828	5365.07	-6.3536	4.45792e-128	Pxn	0	0	NO
FBgn0011829	8.93765	-4.74211	3.12509e-06	Ret	0	0	NO
FBgn0011836	768.542	-0.225395	0.00515502	Taf2	0	0	NO
FBgn0011837	2617.86	-0.345016	0.00176627	Tis11	4	4	YES
FBgn0012027	0.730852	-2.23597	0	tRNA:Tyr-GTA-1-5	0	0	NO
FBgn0012034	1133.32	-2.28281	3.37135e-56	AcCoAS	0	0	NO
FBgn0012036	5813.55	-0.853807	2.85229e-84	Aldh	0	0	NO
FBgn0012037	818.664	-2.90352	5.31732e-56	Ance	0	0	NO
FBgn0012042	3.75619	-0.336306	0.770043	AttA	0	0	NO
FBgn0012051	728.53	-1.10154	3.79887e-22	CalpA	1	1	YES
FBgn0012058	1105.88	0.374136	3.8328e-07	Cdc27	0	0	NO
FBgn0013263	246.87	-0.791391	4.59501e-09	Trl	4	2	NO
FBgn0013269	7435.38	0.979623	1.45947e-23	Fkbp39	0	0	NO
FBgn0013272	12678.3	-1.29261	7.53691e-28	Gp150	0	0	NO
FBgn0013275	54.0698	-5.3854	1.17425e-09	Hsp70Aa	1	1	YES
FBgn0013276	96.3068	-5.10262	2.56718e-10	Hsp70Ab	1	1	YES
FBgn0013277	34.0451	-6.01508	6.27706e-11	Hsp70Ba	0	0	NO
FBgn0013278	10.0085	-7.0106	6.60019e-07	Hsp70Bb	0	0	NO
FBgn0013279	15.3331	-7.62185	7.59695e-05	Hsp70Bc	0	0	NO
FBgn0013303	545.635	-0.229889	0.0710197	Nca	0	0	NO
FBgn0013305	1481.72	-0.41617	7.77551e-06	Nmda1	0	0	NO
FBgn0013307	5.3193	-3.11041	0.0053779	Odc1	0	0	NO
FBgn0013323	2.70232	1.05652	0.383625	Ptth	0	0	NO
FBgn0013325	25660.1	0.0243775	0.821721	RpL11	1	2	YES
FBgn0013334	1270.44	-0.484817	3.65874e-14	Sap47	0	0	NO
FBgn0013342	4.4223	-2.88051	0.00443405	nSyb	0	0	NO
FBgn0013343	736.338	-1.02036	5.02997e-26	Syx1A	0	0	NO
FBgn0013347	1242.6	0.200087	0.0368569	TfIIA-S	0	0	NO
FBgn0013348	2.66423	0.0311125	0.980485	TpnC41C	0	0	NO
FBgn0013432	525.689	0.820765	4.79344e-12	bcn92	0	0	NO
FBgn0013435	233.719	0.59815	2.41209e-05	Cdc2rk	0	0	NO
FBgn0013467	0.917297	-2.71456	0.281764	igl	0	0	NO
FBgn0013469	150.033	-0.242889	0.326406	klu	0	0	NO
FBgn0013531	155.978	-0.00877378	0.961443	MED20	0	0	NO
FBgn0013548	593.283	0.232472	0.0316641	l(2)dtl	0	0	NO
FBgn0013563	265.572	0.151473	0.261438	Pex1	0	0	NO
FBgn0013576	3449.71	-0.434121	2.11797e-08	mtd	2	2	NO
FBgn0013672	15253.4	0.293276	0.014602	mt:ATPase6	0	0	NO
FBgn0013673	0.667176	0.0569334	0	mt:ATPase8	0	0	NO
FBgn0013674	62044.6	-0.260137	0.00598011	mt:CoI	0	0	NO
FBgn0013675	20462	-0.230751	0.0247824	mt:CoII	0	0	NO
FBgn0013676	49452.8	-0.163941	0.106532	mt:CoIII	0	0	NO
FBgn0013678	32545.1	-0.14304	0.207678	mt:Cyt-b	0	0	NO
FBgn0013679	6081.82	0.0267805	0.822824	mt:ND1	0	0	NO
FBgn0013680	118.599	-0.355729	0.0893196	mt:ND2	0	0	NO
FBgn0013681	1809.77	-0.520401	1.02156e-07	mt:ND3	0	0	NO
FBgn0013683	8.21876	-0.821187	0.262268	mt:ND4L	0	0	NO
FBgn0013684	4578.64	0.126488	0.243817	mt:ND5	0	0	NO
FBgn0013685	19.5198	-0.705759	0.217089	mt:ND6	0	0	NO
FBgn0013686	478214	0.0182229	0.856902	mt:lrRNA	0	0	NO
FBgn0013688	406.77	-1.11307	0.108651	mt:srRNA	0	0	NO
FBgn0013710	3.32815	-2.74841	0.0998286	mt:tRNA:Tyr-GTA	0	0	NO
FBgn0013717	503.221	-0.504422	4.612e-08	not	0	0	NO
FBgn0013718	1355.95	-0.023764	0.800835	nuf	3	5	NO
FBgn0013720	534.856	-1.33964	6.81758e-36	pck	1	0	YES
FBgn0013726	3705.87	-0.406063	3.9239e-08	pnut	1	1	YES
FBgn0013732	468.447	1.41909	3.82963e-37	sced	0	0	NO
FBgn0013733	2472.49	-1.52144	5.24564e-37	shot	4	3	YES
FBgn0013746	1386.23	-0.0042931	0.968417	alien	1	0	YES
FBgn0013749	1394.17	0.127448	0.295179	Arf4	0	0	NO
FBgn0013750	1511.95	0.385694	9.8351e-06	Arf6	1	1	YES
FBgn0013753	275.889	0.154807	0.195578	Bgb	0	0	NO
FBgn0013756	3006.06	-0.183235	0.0129712	Mtor	0	0	NO
FBgn0013759	671.225	0.324906	0.000390705	CASK	0	0	NO
FBgn0013762	269.392	-0.410053	0.000615558	Cdk5	0	0	NO
FBgn0013763	2358.16	-1.55035	1.95123e-54	Idgf6	0	0	NO
FBgn0013764	894.914	0.00607633	0.950877	Chi	0	0	NO
FBgn0013765	823.853	0.0692901	0.497876	cnn	1	0	YES
FBgn0013770	17752.6	-0.808984	1.81235e-06	Cp1	2	2	NO
FBgn0013771	382.477	-2.97278	4.7939e-88	Cyp6a9	0	0	NO
FBgn0013772	1.23422	-0.474762	0.782758	Cyp6a8	0	0	NO
FBgn0013773	462.669	4.14059	4.00443e-200	Cyp6a22	1	2	YES
FBgn0013799	792.676	-0.0807509	0.332127	Deaf1	0	0	NO
FBgn0013810	61.6153	1.48176	8.86456e-10	Dhc36C	0	0	NO
FBgn0013811	15.9151	-1.3574	0.00849463	Dhc62B	0	0	NO
FBgn0013812	0.77975	-0.43515	0	Dhc93AB	0	0	NO
FBgn0013813	10.5201	0.527314	0.345249	Dhc98D	0	0	NO
FBgn0013949	2.50767	-4.2558	0.00388856	Elal	0	0	NO
FBgn0013953	1089.46	-1.60447	8.59219e-06	Esp	0	0	NO
FBgn0013954	8227.36	0.210182	0.0443558	Fkbp12	0	0	NO
FBgn0013973	3.63112	-5.53871	3.48459e-05	Gycbeta100B	0	0	NO
FBgn0013981	4482.11	-0.327203	0.000109341	His4r	1	2	YES
FBgn0013983	159.755	-0.436358	0.00436479	imd	1	3	YES
FBgn0013987	1710.02	-0.679076	1.54374e-28	MAPk-Ak2	1	3	YES
FBgn0013995	594.058	1.74799	2.82166e-35	Calx	1	1	YES
FBgn0013997	1192.83	-1.3649	2.34061e-41	Nrx-IV	1	0	NO
FBgn0014000	15.3548	-2.75953	2.2436e-07	Hf	0	0	NO
FBgn0014006	2040.48	-1.24628	1.1009e-31	Ask1	0	0	NO
FBgn0014007	999.537	-0.166192	0.0591814	Ptp69D	0	0	NO
FBgn0014009	1478	-0.498654	2.48933e-08	Rab2	0	0	NO
FBgn0014010	3753.51	-0.373684	1.13508e-07	Rab5	1	1	YES
FBgn0014011	1387.63	-1.46085	2.14376e-30	Rac2	0	0	NO
FBgn0014018	1423.77	-0.579556	6.51852e-06	Rel	0	0	NO
FBgn0014019	0.531958	2.29324	0	Rh5	0	0	NO
FBgn0014020	5119.01	-1.18001	3.38103e-100	Rho1	0	0	NO
FBgn0014022	462.203	0.803095	1.05602e-12	Rlb1	0	0	NO
FBgn0014023	668.734	0.402849	0.000445457	mRpL47	0	0	NO
FBgn0014024	1523.19	0.0219672	0.830329	Rnp4F	0	0	NO
FBgn0014026	46979.5	0.142526	0.0886775	RpL7A	0	0	NO
FBgn0014028	1816.82	-0.122592	0.069194	SdhB	0	0	NO
FBgn0014029	2087.92	-1.11106	2.61112e-54	Septin2	0	0	NO
FBgn0014031	15.5687	-1.68372	0.000991015	Agxt	0	0	NO
FBgn0014032	399.783	0.440139	9.1351e-06	Sptr	0	0	NO
FBgn0014033	256.664	-7.16046	1.98391e-76	Sr-CI	0	0	NO
FBgn0014037	2398.52	0.0963039	0.363451	Su(Tpl)	3	3	NO
FBgn0014073	166.268	-2.17441	1.68932e-19	Tie	0	0	NO
FBgn0014075	1723.17	0.233049	0.0226234	Uggt	0	0	NO
FBgn0014076	1002.47	8.69171	3.18128e-33	Vm32E	0	0	NO
FBgn0014092	634.786	0.168845	0.076901	CG4278	0	0	NO
FBgn0014127	653.975	-0.278317	0.0116371	barr	1	2	YES
FBgn0014133	4402.74	0.21087	0.00888176	bif	2	8	YES
FBgn0014135	57.8286	-2.62397	2.12908e-16	bnl	0	0	NO
FBgn0014141	5819.86	-1.73115	2.33882e-30	cher	1	0	YES
FBgn0014143	22.6529	-2.05045	3.64455e-07	croc	0	0	NO
FBgn0014163	7781.32	-2.16472	3.9137e-122	fax	3	5	YES
FBgn0014184	12092.3	-1.13124	4.35345e-29	Oda	2	4	YES
FBgn0014189	4682.67	0.277898	0.00811273	Hel25E	0	0	NO
FBgn0014269	626.655	-0.211765	0.0239421	prod	0	0	NO
FBgn0014340	305.064	0.0385723	0.784748	mof	0	0	NO
FBgn0014342	97.4138	-0.375278	0.0665391	mia	0	0	NO
FBgn0014343	406.889	-0.805373	9.05672e-09	mirr	0	0	NO
FBgn0014366	800.981	0.0873136	0.365692	noi	0	0	NO
FBgn0014368	1.82633	-0.940131	0.549286	nol	0	0	NO
FBgn0014380	300.317	-2.35753	4.39833e-43	RhoL	0	0	NO
FBgn0014388	784.976	-0.684197	1.86816e-07	sty	0	0	NO
FBgn0014391	2007.63	-0.0244857	0.823591	sun	1	1	NO
FBgn0014395	16.3118	3.87464	1.08635e-08	tilB	0	0	NO
FBgn0014396	1479.25	-0.909014	2.72243e-24	tim	0	0	NO
FBgn0014411	1544.24	0.00964892	0.934828	Vps26	0	0	NO
FBgn0014417	487.045	1.35091	8.01143e-21	CG13397	1	0	YES
FBgn0014427	1189.29	0.283855	0.00749941	CG11899	0	0	NO
FBgn0014455	5732.63	0.916327	1.11786e-35	Ahcy	0	0	NO
FBgn0014464	1196.49	11.3666	1.9346e-26	Cp7Fa	0	0	NO
FBgn0014465	1125.54	4.7745	2.09381e-27	Cp7Fb	0	0	NO
FBgn0014466	2051.43	8.46952	2.6775e-60	Cp7Fc	0	0	NO
FBgn0014469	641.664	1.38564	8.8609e-38	Cyp4e2	0	0	NO
FBgn0014857	2279.81	-0.210585	0.00616143	His3.3A	1	1	YES
FBgn0014859	9.8919	-6.99229	2.13524e-09	Hr38	1	1	YES
FBgn0014861	1731.51	0.502183	3.87702e-09	Mcm2	0	0	NO
FBgn0014863	1135.71	-3.86249	5.02212e-188	Mlp84B	0	0	NO
FBgn0014865	2.31511	-4.90461	0.0046395	Mtk	0	0	NO
FBgn0014868	2322.77	0.0115647	0.918309	Ost48	0	0	NO
FBgn0014869	1985.51	1.02502	3.64062e-44	Pglym78	0	0	NO
FBgn0014870	1637.9	-0.280457	0.0105476	Psi	0	0	NO
FBgn0014877	731.273	0.57369	4.1847e-07	Roe1	0	0	NO
FBgn0014879	3144.71	0.383476	0.000215214	Set	0	0	NO
FBgn0014906	2218.76	-1.40443	3.72626e-23	Hydr2	0	0	NO
FBgn0014930	537.542	0.478453	4.81742e-09	CG2846	0	0	NO
FBgn0014931	615.988	2.1768	8.93968e-102	CG2678	1	1	YES
FBgn0015000	330.811	0.153548	0.316095	betaggt-I	0	0	NO
FBgn0015010	1.07207	-2.0449	0.26331	Ag5r	0	0	NO
FBgn0015011	40.0308	-1.35926	6.14835e-05	AhcyL2	0	0	NO
FBgn0015019	7841.89	0.532159	3.54697e-11	CCT3	0	0	NO
FBgn0015024	5978	0.389782	5.94098e-08	CkIalpha	0	0	NO
FBgn0015025	73.6735	-0.0836022	0.74651	CkIIalpha-i1	0	0	NO
FBgn0015031	1432.3	-0.348706	1.29294e-06	cype	0	0	NO
FBgn0015032	1.58567	1.02643	0.613266	Cyp4c3	0	0	NO
FBgn0015033	291.557	-6.12737	5.23053e-91	Cyp4d8	0	0	NO
FBgn0015034	1.52003	2.10751	0.232594	Cyp4e1	0	0	NO
FBgn0015035	2.91753	-2.68559	0.0450729	Cyp4e3	0	0	NO
FBgn0015036	28.1052	1.25254	0.000143413	Cyp4ae1	0	0	NO
FBgn0015037	16.9835	-0.196104	0.711542	Cyp4p1	0	0	NO
FBgn0015039	35.1707	3.00597	2.98654e-06	Cyp9b2	0	0	NO
FBgn0015040	174.716	-2.58657	9.47125e-24	Cyp9c1	0	0	NO
FBgn0015075	956.031	0.330249	0.000714096	Ddx1	0	0	NO
FBgn0015218	9417.05	1.26095	1.27106e-65	eIF4E1	1	2	YES
FBgn0015221	10212.5	-1.09095	1.07563e-21	Fer2LCH	2	4	YES
FBgn0015222	9908.97	-0.80846	3.31504e-15	Fer1HCH	1	4	YES
FBgn0015229	1097.84	0.306413	0.027073	glec	1	3	NO
FBgn0015239	1148.79	0.148836	0.0491922	Hr78	0	0	NO
FBgn0015240	425.591	0.751806	6.61681e-11	Hr96	0	0	NO
FBgn0015245	11302.4	0.988379	6.09175e-18	Hsp60A	0	0	NO
FBgn0015247	1071.63	-0.108558	0.206868	Diap2	0	0	NO
FBgn0015268	19546.7	0.633238	1.18923e-22	Nap1	0	0	NO
FBgn0015269	756.95	-0.552783	1.01001e-09	Nf1	0	0	NO
FBgn0015270	325.072	0.716065	8.18863e-12	Orc2	0	0	NO
FBgn0015271	286.029	0.325065	0.0201481	Orc5	0	0	NO
FBgn0015277	403.385	-0.612116	5.37867e-06	Pi3K59F	0	0	NO
FBgn0015278	1041.51	-0.00160769	0.991092	Pi3K68D	0	0	NO
FBgn0015279	1386.58	-0.118159	0.166252	Pi3K92E	0	0	NO
FBgn0015282	2864.15	0.0621641	0.516491	Rpt2	0	0	NO
FBgn0015283	2782.54	0.496013	7.29818e-09	Rpn10	1	0	YES
FBgn0015286	1667.7	0.311787	1.32029e-06	Rala	2	4	YES
FBgn0015288	17495.4	0.0791007	0.381769	RpL22	1	1	YES
FBgn0015295	641.313	0.132817	0.127221	Shark	0	0	NO
FBgn0015296	875.895	-0.440574	3.99063e-06	Shc	0	0	NO
FBgn0015298	562.023	0.0472854	0.72109	Srp19	0	0	NO
FBgn0015299	809.387	0.381464	1.21004e-07	Ssb-c31a	0	0	NO
FBgn0015316	11.9392	-0.503878	0.389805	Try29F	0	0	NO
FBgn0015320	1315.92	0.139571	0.0845169	Ubc2	0	0	NO
FBgn0015321	2101.15	0.538966	9.59526e-21	Ubc4	0	0	NO
FBgn0015331	384.964	-0.469217	7.27216e-06	abs	0	0	NO
FBgn0015338	540.78	0.267862	0.0037201	CG5861	0	0	NO
FBgn0015351	152.307	-0.17927	0.310235	Mettl4	0	0	NO
FBgn0015359	1046.47	0.749404	1.08116e-25	CG2034	0	0	NO
FBgn0015360	666.951	1.13855	5.78073e-12	oxt	0	0	NO
FBgn0015371	813.431	0.28547	0.0365421	chn	3	1	YES
FBgn0015372	566.706	-0.283091	0.157218	RabX1	0	0	NO
FBgn0015376	317.412	0.546906	9.98899e-07	cutlet	0	0	NO
FBgn0015379	702.395	0.26329	0.0109017	dod	0	0	NO
FBgn0015380	403.343	-2.76674	2.10525e-83	drl	0	0	NO
FBgn0015391	1308.37	-0.367828	3.55996e-05	glu	0	0	NO
FBgn0015396	1420.99	0.160787	0.0982725	jumu	1	2	YES
FBgn0015399	740.171	-0.616939	7.26954e-09	kek1	1	1	YES
FBgn0015400	36.0692	-5.59351	7.85694e-20	kek2	0	0	NO
FBgn0015402	524.128	0.175958	0.0624859	ksr	0	0	NO
FBgn0015477	2175.45	-0.146191	0.0708219	Rme-8	1	1	YES
FBgn0015509	3576	0.224682	0.000318319	Cul1	0	0	NO
FBgn0015513	2202.21	-1.38411	1.42046e-27	mbc	1	2	YES
FBgn0015519	22.4716	-0.59816	0.159235	nAChRalpha3	1	6	YES
FBgn0015520	667.177	-0.622529	9.86721e-15	nonA-l	0	0	NO
FBgn0015521	12184.7	0.0475184	0.677682	RpS21	0	0	NO
FBgn0015522	565.84	1.85467	1.09702e-37	olf186-M	1	0	NO
FBgn0015527	2848.78	0.820282	2.62255e-18	peng	0	0	NO
FBgn0015543	38.2787	0.0433526	0.901621	snoRNA:Me28S-A1322	0	0	NO
FBgn0015544	580.047	0.214837	0.0459069	spag	0	0	NO
FBgn0015546	848.635	0.186837	0.0162686	spel1	0	0	NO
FBgn0015553	297.676	1.60119	2.58696e-33	tos	0	0	NO
FBgn0015558	772.403	1.91832	1.15693e-85	tty	1	2	NO
FBgn0015561	0.538939	-1.78622	0	unpg	0	0	NO
FBgn0015568	1053.01	5.68324	1.1719e-231	alpha-Est1	1	0	NO
FBgn0015569	328.855	1.34728	3.08292e-38	alpha-Est10	0	0	NO
FBgn0015570	7.54874	0.239491	0.738332	alpha-Est2	0	0	NO
FBgn0015571	478.83	0.600148	0.00188828	alpha-Est3	1	0	YES
FBgn0015572	27.9705	-0.632487	0.201055	alpha-Est4	0	0	NO
FBgn0015575	111.77	-1.07136	7.00386e-08	alpha-Est7	0	0	NO
FBgn0015576	216.074	-4.08449	3.64394e-52	alpha-Est8	0	0	NO
FBgn0015577	349.81	-0.813682	1.22273e-07	alpha-Est9	0	0	NO
FBgn0015582	252.75	0.592086	8.36795e-06	dare	0	0	NO
FBgn0015589	1176.05	-0.432114	9.57932e-07	Apc	1	0	NO
FBgn0015591	1.99603	-0.831141	0.552659	AstA	0	0	NO
FBgn0015600	1014.5	0.94167	3.27452e-27	toc	1	3	YES
FBgn0015602	801.461	0.294234	0.000263287	BEAF-32	1	1	YES
FBgn0015609	491.787	-0.769	1.61794e-06	CadN	1	2	NO
FBgn0015614	2004.64	0.592041	1.20941e-12	CanB2	1	1	YES
FBgn0015615	1240.33	-0.184181	0.0139949	SMC3	0	0	NO
FBgn0015618	201.597	-0.080166	0.588515	Cdk8	0	0	NO
FBgn0015621	285.415	0.462557	2.73754e-05	Clp	0	0	NO
FBgn0015622	3003.75	0.0114891	0.912962	Cnx99A	0	0	NO
FBgn0015623	2131.61	-0.426708	4.27384e-08	Cpr	1	2	YES
FBgn0015625	729.071	1.06277	9.86306e-29	CycB3	1	1	YES
FBgn0015663	44.964	-0.0373197	0.904986	Ugt36A1	0	0	NO
FBgn0015664	1315.36	-0.297101	0.000578773	Dref	1	0	YES
FBgn0015714	168.777	-1.30132	1.14801e-18	Cyp6a17	0	0	NO
FBgn0015721	3.26808	-3.2536	0.0127016	ktub	0	0	NO
FBgn0015737	2951.14	0.288855	0.000273189	Hmu	0	0	NO
FBgn0015754	2395.53	0.124763	0.0644185	Lis-1	1	4	YES
FBgn0015756	31846	0.0758582	0.423698	RpL9	0	0	NO
FBgn0015765	429.221	-0.364916	0.00289891	p38a	0	0	NO
FBgn0015766	1678.14	-3.61145	1.47712e-105	Msr-110	0	0	NO
FBgn0015772	1373.9	-0.564008	1.37799e-09	Nak	0	0	NO
FBgn0015773	53.6388	-3.15891	3.06728e-20	NetA	0	0	NO
FBgn0015774	471.281	-5.43468	9.23564e-166	NetB	0	0	NO
FBgn0015776	3955.46	-0.776515	6.4031e-22	nrv1	1	1	YES
FBgn0015777	463.088	-1.87062	2.11734e-59	nrv2	0	0	NO
FBgn0015778	11737.4	0.990024	7.6407e-32	rin	1	1	NO
FBgn0015781	408.308	-0.0630162	0.570732	P5cr	0	0	NO
FBgn0015789	2600.68	-0.0437966	0.572411	Rab10	1	1	YES
FBgn0015790	5033.21	-0.0773018	0.287924	Rab11	1	3	NO
FBgn0015791	724.643	-0.246281	0.00584672	Rab14	0	0	NO
FBgn0015793	206.301	-0.257615	0.129592	Rab19	0	0	NO
FBgn0015794	482.244	-0.450566	0.000102884	Rab18	0	0	NO
FBgn0015795	4587.35	-1.1191	7.67455e-10	Rab7	0	0	NO
FBgn0015797	1389.64	-0.0583472	0.492935	Rab6	1	1	YES
FBgn0015799	1685.66	0.448877	1.0574e-06	Rbf	1	3	NO
FBgn0015801	670.893	-1.57109	5.58515e-41	Reg-5	0	0	NO
FBgn0015803	729.001	-0.790316	4.83928e-17	RtGEF	0	0	NO
FBgn0015805	2111.12	-0.189852	0.0411868	HDAC1	0	0	NO
FBgn0015808	1132.17	-0.477102	5.01684e-05	ScpX	0	0	NO
FBgn0015818	939.045	0.116678	0.203184	Spx	0	0	NO
FBgn0015828	927.33	0.869464	2.19301e-24	TfIIEalpha	0	0	NO
FBgn0015829	403.175	0.028745	0.830641	TfIIEbeta	0	0	NO
FBgn0015831	5.04716	-0.543933	0.53205	Rtnl2	0	0	NO
FBgn0015834	5127.24	0.169123	0.00925739	eIF3i	0	0	NO
FBgn0015838	1158.95	-0.0153533	0.88799	Vang	1	1	YES
FBgn0015872	347.499	-3.11675	2.92673e-116	Drip	0	0	NO
FBgn0015903	2356.76	-1.15857	1.58654e-65	apt	1	0	YES
FBgn0015905	427.579	0.35231	0.000268522	ast	0	0	NO
FBgn0015924	3703.58	-0.909597	1.33651e-06	crq	1	2	YES
FBgn0015925	646.88	0.326124	7.54113e-05	csul	0	0	NO
FBgn0015926	272.499	1.2331	3.36226e-14	dah	1	0	YES
FBgn0015929	2181.03	-0.00492472	0.956855	dpa	1	3	YES
FBgn0015949	2217.29	-0.287156	0.000311509	hrg	1	3	YES
FBgn0016013	12.7113	-1.62305	0.00118555	Faa	0	0	NO
FBgn0016031	11.8515	-5.80332	2.16027e-07	lama	1	1	YES
FBgn0016032	91.4334	-3.09542	2.60099e-34	lbm	0	0	NO
FBgn0016034	1485.09	0.454147	1.30859e-06	mael	0	0	NO
FBgn0016036	14.9672	0.877249	0.0582999	mei-P22	0	0	NO
FBgn0016038	877.206	0.713513	8.71844e-19	Vsp37A	0	0	NO
FBgn0016041	3089.61	0.758744	2.98823e-14	Tom40	0	0	NO
FBgn0016053	596.522	8.11035	6.04082e-97	pgc	1	1	YES
FBgn0016054	542.099	2.26301	6.97709e-94	phr6-4	0	0	NO
FBgn0016059	2367.74	-1.14566	4.65342e-60	Sema1b	1	1	NO
FBgn0016061	11.0761	-3.4902	3.11163e-06	side	0	0	NO
FBgn0016070	3795.51	3.18296	2.54629e-144	smg	1	3	YES
FBgn0016075	14545.7	-1.19238	2.35786e-23	vkg	1	0	NO
FBgn0016076	821.639	-2.18417	1.02864e-84	vri	2	6	NO
FBgn0016078	632.834	0.333789	0.0131667	wun	2	3	YES
FBgn0016081	1274.04	-1.23953	5.76321e-36	fry	2	1	NO
FBgn0016119	2590.78	0.146157	0.0786659	ATPsynCF6	0	0	NO
FBgn0016120	3520.79	-0.169557	0.0678343	ATPsynD	0	0	NO
FBgn0016122	690.999	1.48877	4.53748e-17	Acer	1	4	YES
FBgn0016123	1194.29	-4.43274	3.55072e-12	Alp4	1	1	YES
FBgn0016126	1892.77	-0.684109	5.82676e-10	CaMKI	0	0	NO
FBgn0016131	970.371	1.11732	9.51427e-44	Cdk4	2	2	YES
FBgn0016641	515.049	0.0354088	0.833052	PTP-ER	0	0	NO
FBgn0016650	3.272	1.375	0.249134	Lgr1	0	0	NO
FBgn0016660	15.0449	7.11063	2.85344e-10	H15	0	0	NO
FBgn0016672	461.784	0.16439	0.239736	Ipp	0	0	NO
FBgn0016675	1.44821	-4.23758	0.103876	Lectin-galC1	0	0	NO
FBgn0016684	17.3149	0.081788	0.875916	NaPi-T	0	0	NO
FBgn0016685	8433.44	0.72703	2.32171e-15	Nlp	0	0	NO
FBgn0016687	5170.98	0.535177	2.17272e-14	Nurf-38	0	0	NO
FBgn0016691	3461.73	-0.125682	0.114959	ATPsynO	0	0	NO
FBgn0016693	3009.07	-0.534287	2.66059e-09	Past1	0	0	NO
FBgn0016694	1577.02	-1.02792	3.08878e-26	Pdp1	3	3	NO
FBgn0016696	1127.78	0.00832328	0.935665	Pitslre	0	0	NO
FBgn0016697	2395.57	0.268386	0.00123454	Prosalpha5	0	0	NO
FBgn0016698	403.14	0.0268443	0.814856	Ptpa	0	0	NO
FBgn0016701	764.038	-0.183016	0.0154862	Rab4	0	0	NO
FBgn0016715	53.0852	2.42082	1.20406e-09	Reg-2	0	0	NO
FBgn0016726	16652.4	0.0482351	0.63212	RpL29	0	0	NO
FBgn0016754	498.031	-0.802112	1.26108e-07	sba	0	0	NO
FBgn0016756	3383.67	-0.88025	1.21829e-43	Usp47	0	0	NO
FBgn0016762	335.224	-0.445493	2.14624e-05	angel	0	0	NO
FBgn0016794	1359.7	0.265241	0.0546531	dos	2	2	YES
FBgn0016797	2057.28	-2.2867	1.95099e-74	fz2	1	1	NO
FBgn0016917	3324.61	-1.04071	1.67877e-66	Stat92E	0	0	NO
FBgn0016919	9.91955	4.43868	2.04359e-05	nompB	0	0	NO
FBgn0016920	1.7255	-2.85458	0.0708545	nompC	0	0	NO
FBgn0016926	3758.68	-1.72825	4.10896e-35	Pino	1	5	YES
FBgn0016930	1220.65	-0.672025	3.99166e-10	Dyrk2	1	2	YES
FBgn0016970	165.422	1.10391	1.9569e-16	l(2)k10201	0	0	NO
FBgn0016974	47.2285	8.76565	3.22017e-16	swaPsi	0	0	NO
FBgn0016977	2104.05	-1.22185	2.89854e-62	spen	1	0	NO
FBgn0016978	924.394	0.143894	0.26194	snRNP-U1-70K	0	0	NO
FBgn0016983	4524.87	-0.0322285	0.675474	smid	1	1	YES
FBgn0016984	1705.07	-0.424928	5.48093e-07	sktl	1	2	YES
FBgn0017414	118.66	-0.609869	0.00030619	cag	0	0	NO
FBgn0017418	1039.96	-0.150092	0.098408	ari-1	1	1	YES
FBgn0017424	0.749489	0.512875	0	asRNA:CR11538	0	0	NO
FBgn0017429	815.741	0.603003	2.33911e-13	CG5989	0	0	NO
FBgn0017430	264.83	0.0424865	0.789299	Nelf-E	0	0	NO
FBgn0017448	75.6929	3.085	2.72216e-30	CG2187	0	0	NO
FBgn0017457	858.138	0.244015	0.00295482	U2af38	0	0	NO
FBgn0017482	235.784	-1.29267	5.9103e-28	T3dh	1	1	NO
FBgn0017545	46081	0.0634071	0.37274	RpS3A	1	2	NO
FBgn0017550	2691.65	0.449051	4.11502e-17	Rga	2	4	YES
FBgn0017551	357.32	1.13137	6.38018e-16	Rca1	1	2	NO
FBgn0017558	922.161	0.202808	0.0338827	Pdk	0	0	NO
FBgn0017561	1136.04	4.35895	4.68762e-231	Ork1	1	9	YES
FBgn0017566	3648.13	0.0834852	0.264577	ND-75	0	0	NO
FBgn0017567	1030.67	0.264959	0.00104389	ND-23	1	0	YES
FBgn0017572	1657.56	-0.203252	0.0313865	Mo25	0	0	NO
FBgn0017577	1406.31	0.427181	1.79343e-07	Mcm5	0	0	NO
FBgn0017578	592.752	-0.159867	0.106126	Max	0	0	NO
FBgn0017579	28833.5	0.0965849	0.276802	RpL14	0	0	NO
FBgn0017581	13778.5	-0.179589	0.0164378	Lk6	1	0	NO
FBgn0019624	3902.44	0.0753921	0.422058	COX5A	0	0	NO
FBgn0019637	1178.6	0.313604	9.45925e-06	Atu	1	1	YES
FBgn0019644	3804.88	0.013872	0.893707	ATPsynB	0	0	NO
FBgn0019650	3.30803	-0.379857	0.802543	toy	0	0	NO
FBgn0019662	1059.1	-1.09588	2.00954e-35	qm	0	0	NO
FBgn0019686	2939.46	2.35959	9.07901e-247	lok	1	2	YES
FBgn0019830	1028.83	0.152903	0.0633635	colt	0	0	NO
FBgn0019890	2121.11	-0.654637	3.93198e-09	Smg5	0	0	NO
FBgn0019925	1648.74	0.0506397	0.628236	Surf4	0	0	NO
FBgn0019929	1.41099	-3.32429	0.0626424	Ser7	0	0	NO
FBgn0019932	422.406	-0.20652	0.0387751	SamDC	0	0	NO
FBgn0019936	18583.2	0.155452	0.0597317	RpS20	0	0	NO
FBgn0019938	2695.47	0.521772	2.89179e-09	Polr1A	0	0	NO
FBgn0019940	1.72432	-4.44115	0.00915757	Rh6	0	0	NO
FBgn0019949	470.586	-0.0904929	0.444805	Cdk9	0	0	NO
FBgn0019952	26.2069	-0.666952	0.0945653	Orct	0	0	NO
FBgn0019957	1864.75	0.0850655	0.229203	ND-42	0	0	NO
FBgn0019960	2449.53	0.0697547	0.403442	Mitofilin	0	0	NO
FBgn0019968	1413.93	-0.83669	1.62225e-19	Khc-73	1	2	NO
FBgn0019972	967.829	-0.549981	4.06765e-07	Drice	1	2	YES
FBgn0019982	570.742	0.117327	0.171252	Gs1l	0	0	NO
FBgn0019985	33.5877	3.25656	4.8099e-14	mGluR	1	1	YES
FBgn0019990	960.724	-0.10229	0.350337	Gcn2	0	0	NO
FBgn0020018	414.978	0.198318	0.0400883	Ppox	0	0	NO
FBgn0020224	1001.71	0.61593	2.05421e-13	Cbl	1	1	YES
FBgn0020235	4513.92	-0.0535951	0.48563	ATPsyngamma	0	0	NO
FBgn0020236	4335.03	0.0197799	0.848546	ATPCL	1	0	NO
FBgn0020238	18703.3	0.13631	0.081514	14-3-3epsilon	3	2	NO
FBgn0020248	826.299	2.33452	3.20708e-121	stet	3	5	YES
FBgn0020249	1195.69	-1.07756	1.34886e-32	stck	0	0	NO
FBgn0020251	622.88	-0.896932	1.83787e-23	sfl	0	0	NO
FBgn0020255	13003.7	0.790593	2.84413e-18	Ran	0	0	NO
FBgn0020257	286.522	-1.37545	1.4949e-17	Ppa	0	0	NO
FBgn0020261	1549.53	0.0957654	0.189816	pcm	0	0	NO
FBgn0020269	110.211	-3.28042	2.9989e-41	mspo	1	1	YES
FBgn0020270	606.594	0.137219	0.246702	mre11	0	0	NO
FBgn0020272	459.152	0.632587	2.11492e-10	mst	0	0	NO
FBgn0020277	0.759882	-3.33266	0	lush	0	0	NO
FBgn0020278	1008.98	-1.23901	1.15006e-61	loco	0	0	NO
FBgn0020279	9920.66	-0.137212	0.0503799	lig	0	0	NO
FBgn0020294	391.364	-0.796583	4.42038e-06	ko	0	0	NO
FBgn0020299	402.153	-4.4108	8.34268e-115	stumps	0	0	NO
FBgn0020300	31.7117	1.10997	0.0012257	geko	1	2	YES
FBgn0020304	3689.47	-1.17501	1.07142e-15	drongo	0	0	NO
FBgn0020305	654.139	0.365648	0.00228086	dbe	0	0	NO
FBgn0020306	6120.3	0.0450377	0.76982	dom	0	0	NO
FBgn0020307	1.01202	-1.87513	0.360314	dve	0	0	NO
FBgn0020309	2979.9	-0.956231	5.53874e-56	crol	1	2	NO
FBgn0020312	396.912	0.404247	0.00498457	Tmtc3	0	0	NO
FBgn0020369	2885.72	0.268	4.55955e-05	Rpt6	0	0	NO
FBgn0020370	5007.36	1.07475	1.86381e-64	TppII	1	2	YES
FBgn0020372	102.977	-0.558694	0.00541875	TM4SF	1	5	YES
FBgn0020379	180.935	0.822218	6.25314e-08	Rfx	1	1	YES
FBgn0020381	318.866	-0.515442	2.26083e-05	Dredd	0	0	NO
FBgn0020385	330.515	-0.38639	0.00580029	pug	0	0	NO
FBgn0020386	1518.55	1.3731	2.81588e-66	Pdk1	3	6	YES
FBgn0020388	616.434	-0.292722	0.0128081	Gcn5	0	0	NO
FBgn0020389	806.18	-0.380924	0.00427979	Papss	0	0	NO
FBgn0020391	38.1527	-0.481543	0.0927725	Nrk	0	0	NO
FBgn0020392	2425.91	0.536025	1.44037e-11	Nmt	0	0	NO
FBgn0020399	0.855188	0.706165	0.755373	Mst89B	0	0	NO
FBgn0020407	302.579	0.373514	0.000483891	asun	0	0	NO
FBgn0020412	2150.83	0.221867	0.00613007	JIL-1	3	9	NO
FBgn0020414	436.66	-3.04745	5.36843e-70	Idgf3	0	0	NO
FBgn0020415	545.988	-4.70613	1.54612e-253	Idgf2	0	0	NO
FBgn0020416	145.296	-3.94704	5.5799e-64	Idgf1	0	0	NO
FBgn0020429	4.45034	-5.85107	8.5266e-06	GluRIIB	0	0	NO
FBgn0020440	727.025	-0.305868	0.0103877	Fak	0	0	NO
FBgn0020443	6781.34	0.351881	0.00220443	eRF3	0	0	NO
FBgn0020445	812.866	1.43357	6.30048e-39	E23	2	1	YES
FBgn0020493	460.503	-1.22711	2.18425e-24	Dad	1	1	YES
FBgn0020496	6254.68	-0.54695	5.2692e-18	CtBP	1	0	NO
FBgn0020497	4604.39	-0.00741368	0.93526	emb	0	0	NO
FBgn0020503	1408.3	-0.990684	1.49293e-19	CLIP-190	1	1	YES
FBgn0020506	0.572768	-0.358311	0	Amyrel	0	0	NO
FBgn0020510	1057.92	-0.585549	8.02284e-13	Abi	0	0	NO
FBgn0020513	2115.58	0.286373	0.0100447	Paics	1	0	NO
FBgn0020521	112.281	-3.84607	3.32986e-27	pio	0	0	NO
FBgn0020545	585.168	0.0720533	0.570531	kraken	0	0	NO
FBgn0020616	938.752	-0.602329	2.66358e-12	SA	0	0	NO
FBgn0020618	47624	0.149166	0.0389918	Rack1	0	0	NO
FBgn0020620	896.396	-0.00910945	0.919161	RN-tre	0	0	NO
FBgn0020621	1391.97	-0.308491	0.000613311	Pkn	4	0	YES
FBgn0020622	1519.67	-0.547443	6.22174e-10	Pi3K21B	0	0	NO
FBgn0020626	1515.9	-0.141939	0.0931011	Osbp	0	0	NO
FBgn0020633	1096.9	-0.0137315	0.874902	Mcm7	0	0	NO
FBgn0020647	707.759	0.0775835	0.620022	KrT95D	2	1	YES
FBgn0020653	5986.24	0.301858	0.000117461	Trxr-1	2	2	YES
FBgn0020655	1027.37	0.514148	2.4569e-08	ArfGAP1	0	0	NO
FBgn0020660	131.188	-0.634803	0.315618	eIF4B	0	0	NO
FBgn0020762	1807.36	-1.42057	0.000613766	Atet	0	0	NO
FBgn0020764	781.416	-0.112788	0.45039	Alas	0	0	NO
FBgn0020765	1.13914	3.3962	0.0741288	Acp65Aa	0	0	NO
FBgn0020767	1045.18	-0.0117947	0.903015	Spred	2	6	YES
FBgn0020887	1390.83	-0.140375	0.0427544	Su(z)12	0	0	NO
FBgn0020908	3.73285	-0.54309	0.578257	Scp1	0	0	NO
FBgn0020909	529.868	0.824305	1.35916e-14	Rtc1	0	0	NO
FBgn0020910	55044.4	0.149997	0.0423171	RpL3	0	0	NO
FBgn0020930	404.029	0.332903	0.00162188	Dgkepsilon	0	0	NO
FBgn0021750	374.592	0.484999	7.17367e-07	SerRS-m	1	3	YES
FBgn0021760	1375.05	-0.288637	3.0859e-05	chb	1	2	YES
FBgn0021761	1685.89	0.363608	6.5874e-11	Nup154	0	0	NO
FBgn0021764	1610.01	-0.472975	6.01183e-08	sdk	2	1	YES
FBgn0021765	2717.2	0.364738	1.00589e-08	scu	1	0	NO
FBgn0021767	1.01413	0.646211	0.738691	org-1	0	0	NO
FBgn0021768	1812.59	0.751065	8.14197e-14	nudC	2	3	YES
FBgn0021776	2.73638	-0.488516	0.723112	mira	0	0	NO
FBgn0021795	1783.59	0.296215	0.03958	Tapdelta	0	0	NO
FBgn0021796	1087.85	-0.536274	2.25075e-11	Tor	0	0	NO
FBgn0021800	1717.6	1.12796	2.85833e-47	Reph	2	4	YES
FBgn0021814	523.438	-0.43595	1.56214e-06	Vps28	0	0	NO
FBgn0021825	1130.33	-0.198435	0.00737387	DCTN2-p50	0	0	NO
FBgn0021847	536.328	0.366032	0.00129363	Ttc7	0	0	NO
FBgn0021856	626.529	0.361556	4.26712e-05	l(2)k14505	0	0	NO
FBgn0021872	4010.08	-0.815074	1.60425e-16	Xbp1	0	0	NO
FBgn0021874	739.481	0.522632	6.03836e-07	Nle	0	0	NO
FBgn0021875	573.288	0.642621	7.54729e-13	Zfrp8	0	0	NO
FBgn0021895	3252.91	0.142839	0.0768494	ytr	0	0	NO
FBgn0021906	3021.99	0.0313329	0.724842	RFeSP	0	0	NO
FBgn0021944	687.505	0.69899	1.83773e-13	Coprox	0	0	NO
FBgn0021967	1048.87	-0.0487463	0.540136	ND-PDSW	0	0	NO
FBgn0021979	2254.91	-0.603978	9.61237e-16	l(2)k09913	1	1	YES
FBgn0021995	2531.79	0.695812	2.81286e-18	Rs1	0	0	NO
FBgn0022023	5444.61	0.131269	0.0867738	eIF3h	0	0	NO
FBgn0022027	276.262	-0.0527396	0.706037	Vps25	0	0	NO
FBgn0022029	1620.99	0.552274	3.62452e-14	l(2)k01209	1	1	NO
FBgn0022069	2406.17	0.757675	6.36956e-15	Nnp-1	0	0	NO
FBgn0022097	1753.32	-0.135866	0.120489	Vha36-1	0	0	NO
FBgn0022153	901.544	-0.196525	0.0493696	l(2)k05819	0	0	NO
FBgn0022160	863.068	-1.62784	5.35167e-67	Gpo1	0	0	NO
FBgn0022213	2523.72	0.49574	5.37788e-20	Cse1	0	0	NO
FBgn0022224	298.375	0.109494	0.383284	ubl	0	0	NO
FBgn0022238	3142.26	0.130977	0.0616748	lolal	1	3	YES
FBgn0022288	1764.58	1.03329	6.0015e-23	l(2)09851	0	0	NO
FBgn0022338	985.19	0.301235	5.85403e-05	dnk	0	0	NO
FBgn0022343	3146.95	0.555342	1.93188e-06	CG3760	0	0	NO
FBgn0022344	718.584	0.292817	0.0151934	CG10340	0	0	NO
FBgn0022349	4166.03	-0.275928	0.00512418	CG1910	1	1	NO
FBgn0022355	808.498	-5.72359	4.71819e-42	Tsf1	0	0	NO
FBgn0022359	523.525	1.60208	7.86248e-36	Sodh-2	1	0	YES
FBgn0022361	802.923	-0.976254	5.72869e-30	Pur-alpha	1	1	NO
FBgn0022382	3432.06	-1.78381	3.20243e-94	Pka-R2	0	0	NO
FBgn0022699	505.936	-0.377252	0.000569493	D19B	0	0	NO
FBgn0022702	283.982	1.73624	1.40422e-34	Cht2	0	0	NO
FBgn0022709	409.941	-0.873679	7.57794e-10	Ak1	1	1	YES
FBgn0022710	256.55	-1.36627	7.76978e-19	Ac13E	0	0	NO
FBgn0022724	235.996	0.0585268	0.654104	Taf8	0	0	NO
FBgn0022764	3598.76	-0.116856	0.137976	Sin3A	2	2	YES
FBgn0022768	1085.35	-0.0593804	0.60842	Pp2C1	1	1	NO
FBgn0022770	29.4575	1.29441	0.000608116	Peritrophin-A	0	0	NO
FBgn0022774	2736.4	0.253298	0.00434236	Oat	0	0	NO
FBgn0022786	512.177	0.908571	1.26302e-20	Hira	1	0	YES
FBgn0022787	1280.06	-0.488849	1.28814e-13	Hel89B	1	1	YES
FBgn0022800	9.58224	-2.58164	6.04282e-05	Cad96Ca	0	0	NO
FBgn0022893	21382.2	0.39628	1.13799e-06	Df31	1	2	NO
FBgn0022935	497.429	-0.230428	0.103524	D19A	0	0	NO
FBgn0022936	433.109	0.500203	9.3132e-07	CycH	0	0	NO
FBgn0022942	1734.89	-0.115328	0.170263	Cbp80	0	0	NO
FBgn0022943	356.172	-0.00801962	0.954171	Cbp20	0	0	NO
FBgn0022959	8530.23	0.239813	0.00180448	yps	0	0	NO
FBgn0022960	658.982	-0.223538	0.0153039	vimar	0	0	NO
FBgn0022981	1596.76	3.33374	4.44613e-167	rpk	1	1	YES
FBgn0022984	904.412	-0.513533	2.84916e-07	qkr58E-3	0	0	NO
FBgn0022985	1341.75	-0.138752	0.167366	qkr58E-2	0	0	NO
FBgn0022986	730.142	-0.279794	0.0427745	qkr58E-1	0	0	NO
FBgn0022987	880.941	-0.0728336	0.526062	qkr54B	0	0	NO
FBgn0023000	333.828	-1.30698	2.97358e-36	mth	0	0	NO
FBgn0023001	238.364	-0.7017	0.00127643	melt	0	0	NO
FBgn0023023	416.544	0.0405026	0.787245	CRMP	2	3	NO
FBgn0023076	113.684	-1.61154	4.52674e-18	Clk	0	0	NO
FBgn0023081	1233.78	-0.763612	3.21564e-23	gek	0	0	NO
FBgn0023083	611.153	0.247083	0.014474	fray	1	1	NO
FBgn0023090	4.21906	0.844284	0.378169	dtr	0	0	NO
FBgn0023094	1044.07	0.114969	0.237877	cyc	1	1	YES
FBgn0023095	1264.16	-1.90912	2.98864e-94	caps	1	2	YES
FBgn0023097	1522.42	-0.157372	0.0999768	bon	0	0	NO
FBgn0023129	1122.84	0.071472	0.643751	aay	1	0	YES
FBgn0023130	356.243	0.745719	7.55813e-13	a6	1	1	NO
FBgn0023143	11269.6	0.1032	0.14552	Uba1	0	0	NO
FBgn0023167	1358.06	0.421054	3.99894e-05	SmD3	1	0	YES
FBgn0023169	1526.48	-0.412501	7.68701e-11	AMPKalpha	0	0	NO
FBgn0023170	12929.1	-0.0748107	0.359982	RpL39	0	0	NO
FBgn0023171	430.087	0.19464	0.0813184	rnh1	1	1	NO
FBgn0023172	2365.49	-0.726776	1.23786e-19	RhoGEF2	0	0	NO
FBgn0023174	2376.83	0.31838	6.92966e-05	Prosbeta2	0	0	NO
FBgn0023175	2966.77	0.277329	0.000386891	Prosalpha7	0	0	NO
FBgn0023177	1212.16	-0.279064	2.4646e-05	Pp4-19C	0	0	NO
FBgn0023180	175.099	0.861045	7.12145e-10	Orc6	0	0	NO
FBgn0023181	335.767	0.43522	0.000485038	Orc4	0	0	NO
FBgn0023212	1498.15	0.248895	0.000772144	EloB	0	0	NO
FBgn0023213	10586.3	0.124804	0.180865	eIF4G1	1	2	NO
FBgn0023214	80.1775	-0.421522	0.0710231	edl	0	0	NO
FBgn0023215	1071.45	0.481239	1.63864e-05	Mnt	5	9	YES
FBgn0023216	436.254	0.251365	0.044225	Parg	0	0	NO
FBgn0023388	807.477	0.059735	0.565859	Dap160	0	0	NO
FBgn0023395	438.014	0.207646	0.0677065	Chd3	0	0	NO
FBgn0023407	1622.24	-0.486101	4.7618e-06	B4	2	3	YES
FBgn0023416	9.5102	-0.103471	0.891913	Ac3	1	2	YES
FBgn0023441	1929.17	-0.345945	3.88511e-05	fus	1	6	YES
FBgn0023458	1700.14	-0.568835	4.82283e-16	Rbcn-3A	1	0	NO
FBgn0023477	2798.13	-0.436202	1.94614e-10	Taldo	0	0	NO
FBgn0023479	21.7783	-0.640946	0.155267	teq	1	8	NO
FBgn0023495	1.65547	-0.287936	0.86641	Lip3	0	0	NO
FBgn0023506	262.752	0.415166	0.000203285	Es2	0	0	NO
FBgn0023507	501.737	0.311307	0.0327734	D2hgdh	1	0	YES
FBgn0023508	637.534	0.369296	9.34261e-05	Ocrl	1	2	NO
FBgn0023509	837.446	-0.0465267	0.631019	mip130	0	0	NO
FBgn0023510	758.322	-0.400342	0.000101208	Rbcn-3B	0	0	NO
FBgn0023511	607.998	0.281715	0.00624798	Edem1	0	0	NO
FBgn0023512	902.479	0.201089	0.00894583	eIF2Bepsilon	0	0	NO
FBgn0023513	476.799	0.337873	0.0171823	CG14803	0	0	NO
FBgn0023514	967.598	-0.281888	0.00545636	CG14805	0	0	NO
FBgn0023515	1477.94	2.04135	3.34484e-126	Gcna	1	1	YES
FBgn0023516	508.683	-0.13423	0.268966	Pex5	0	0	NO
FBgn0023517	1110.4	0.887769	4.72165e-46	Pgam5	0	0	NO
FBgn0023518	764.93	-0.424124	2.49255e-07	trr	0	0	NO
FBgn0023519	579.602	0.158978	0.134058	mRpL16	0	0	NO
FBgn0023520	152.793	0.22458	0.18606	CG3857	0	0	NO
FBgn0023521	345.021	0.431391	0.000122766	CG3587	0	0	NO
FBgn0023522	1953.18	1.87875	1.1718e-136	CG11596	1	2	YES
FBgn0023523	2.29922	0.798154	0.607288	Or2a	0	0	NO
FBgn0023524	2.58526	-2.23766	0.081514	CG3078	1	2	NO
FBgn0023525	362.099	-3.5464	6.9682e-78	CG3191	0	0	NO
FBgn0023526	1044.8	0.174716	0.107109	CG2865	2	4	YES
FBgn0023527	1131.72	0.919846	3.33093e-21	CG3071	0	0	NO
FBgn0023528	1928.71	0.296522	6.75801e-05	CG2924	1	2	YES
FBgn0023529	3962.42	0.430508	0.000348365	CG2918	1	0	YES
FBgn0023530	167.725	-0.0562022	0.737082	CG3740	0	0	NO
FBgn0023531	129.804	0.804992	8.28453e-06	CG32809	0	0	NO
FBgn0023534	7.74827	1.09671	0.167969	CG17778	0	0	NO
FBgn0023535	8.22345	-1.41156	0.0378435	arg	3	3	NO
FBgn0023536	347.393	0.701161	3.19822e-08	CG3156	1	2	YES
FBgn0023537	3036.31	0.51614	4.49814e-07	CG17896	1	1	YES
FBgn0023540	264.819	-0.597655	4.66624e-05	CG3630	0	0	NO
FBgn0023541	6.62045	-0.65342	0.36224	Cyp4d14	0	0	NO
FBgn0023542	1551.59	0.898091	3.61232e-30	Nmd3	0	0	NO
FBgn0023545	589.167	0.138159	0.186438	PIG-K	0	0	NO
FBgn0023549	2231.97	-1.60926	3.55936e-05	Mct1	1	2	YES
FBgn0023550	2.38731	-2.23623	0.0700055	FarO	0	0	NO
FBgn0024150	15.9585	-1.0119	0.0497942	Ac78C	0	0	NO
FBgn0024177	1328.91	3.90285	2.83624e-121	zpg	1	1	YES
FBgn0024179	437.355	-2.30533	1.24108e-43	wit	0	0	NO
FBgn0024183	2307.98	-0.445509	0.000398421	vig	1	1	NO
FBgn0024184	0.867836	1.99526	0.45757	unc-4	0	0	NO
FBgn0024187	533.107	-0.502188	2.61477e-06	syd	1	2	NO
FBgn0024188	1102.15	0.474291	6.58326e-07	san	0	0	NO
FBgn0024189	4.94148	-3.43376	0.000945211	sns	0	0	NO
FBgn0024191	298.7	0.132418	0.281365	sip1	0	0	NO
FBgn0024194	558.58	0.00698691	0.954204	rasp	0	0	NO
FBgn0024196	707.36	0.0639965	0.487342	robl	1	2	YES
FBgn0024222	520.19	-0.589107	5.4567e-09	IKKbeta	0	0	NO
FBgn0024227	456.002	-0.271632	0.0193118	aurB	0	0	NO
FBgn0024230	247.012	0.417332	0.0121802	Hs2st	0	0	NO
FBgn0024232	1.48853	-4.24552	0.012654	gprs	0	0	NO
FBgn0024234	990.206	-1.92802	8.06809e-83	gbb	0	0	NO
FBgn0024236	2468.34	0.625201	4.59611e-10	foi	1	0	NO
FBgn0024238	2926.26	-0.557788	6.70515e-10	Fim	2	4	YES
FBgn0024245	449.168	-1.25879	8.82294e-30	dnt	1	0	NO
FBgn0024248	958.501	-0.592419	1.40985e-06	chico	0	0	NO
FBgn0024250	360.539	-1.46512	2.13686e-27	brk	0	0	NO
FBgn0024251	1.17133	-0.917841	0.605463	bbx	2	5	YES
FBgn0024273	641.402	0.0189259	0.890386	WASp	0	0	NO
FBgn0024277	1734.39	-1.96494	3.8531e-99	trio	1	1	NO
FBgn0024285	1475.1	-0.0450939	0.539478	Srp54	0	0	NO
FBgn0024288	0.565716	-2.85999	0	Sox100B	0	0	NO
FBgn0024289	13.983	-5.47286	1.89287e-06	Sodh-1	0	0	NO
FBgn0024291	1384.93	-0.796794	1.83001e-19	Sirt1	0	0	NO
FBgn0024293	32.0381	-4.08386	1.63079e-15	Spn43Ab	0	0	NO
FBgn0024294	40.2187	-3.00649	2.22039e-19	Spn43Aa	0	0	NO
FBgn0024314	1721.2	0.224449	0.00188678	Plap	0	0	NO
FBgn0024315	1292.61	-1.04126	0.00057946	Picot	0	0	NO
FBgn0024319	3.17359	0.910086	0.479464	Nach	0	0	NO
FBgn0024320	2572.94	-1.50418	1.83695e-43	Npc1a	0	0	NO
FBgn0024321	550.519	-1.81257	3.16572e-28	NK7.1	1	3	NO
FBgn0024326	1156.9	0.202619	0.00868026	Mkk4	0	0	NO
FBgn0024329	1492.05	0.0460759	0.573434	Mekk1	2	3	NO
FBgn0024330	461.122	0.92508	1.20394e-16	MED6	0	0	NO
FBgn0024352	5151.52	0.431462	0.000261404	Stip1	0	0	NO
FBgn0024360	507.136	0.323795	0.00103002	MTPAP	0	0	NO
FBgn0024361	1.38777	-2.45341	0.192234	Tsp2A	0	0	NO
FBgn0024362	1450.46	0.589284	6.23256e-18	Naa30A	1	2	YES
FBgn0024364	1598.97	0.769423	3.3175e-18	CG11417	0	0	NO
FBgn0024365	1084.94	0.257989	0.00865207	CG12773	0	0	NO
FBgn0024366	94.3134	-0.443245	0.0328051	CG11409	1	2	YES
FBgn0024371	546.338	0.635159	9.72422e-13	E2f2	0	0	NO
FBgn0024432	1371.2	0.0758626	0.328729	Dlc90F	1	2	YES
FBgn0024491	451.761	-0.215949	0.0688025	Bin1	1	1	NO
FBgn0024509	1605.09	0.406371	3.68915e-09	Sec13	0	0	NO
FBgn0024510	383.548	1.55314	9.15173e-37	dlt	1	1	NO
FBgn0024542	329.969	-0.397989	0.000262523	Neos	0	0	NO
FBgn0024555	2105.18	-0.304226	1.39088e-07	flfl	1	0	NO
FBgn0024556	3411.66	0.762574	8.66077e-16	mEFTu1	0	0	NO
FBgn0024558	1807.12	0.895608	2.44273e-18	Dph5	0	0	NO
FBgn0024689	585.058	0.560569	1.27118e-06	fws	0	0	NO
FBgn0024698	790.584	-0.131938	0.189106	Cpsf160	0	0	NO
FBgn0024728	1000.21	-0.21818	0.00846339	Slip1	0	0	NO
FBgn0024732	847.807	0.985411	2.9546e-18	Drep1	0	0	NO
FBgn0024733	29461.5	-0.0654767	0.378563	RpL10	0	0	NO
FBgn0024734	247.979	-0.355484	0.0110228	PRL-1	0	0	NO
FBgn0024754	959.029	-0.664549	5.39353e-15	Flo1	1	0	NO
FBgn0024804	2322	-0.870116	1.42977e-16	Dbp80	0	0	NO
FBgn0024806	1463.32	-0.596818	1.30903e-15	DIP2	0	0	NO
FBgn0024807	982.733	-0.287468	0.00034688	DIP1	1	0	NO
FBgn0024811	1273.14	-0.10125	0.289101	Crk	0	0	NO
FBgn0024814	2427.45	0.266684	0.000927202	Clc	0	0	NO
FBgn0024833	967.055	0.163738	0.0268605	AP-1mu	0	0	NO
FBgn0024836	59.6542	-8.15065	8.1977e-15	stan	0	0	NO
FBgn0024841	604.385	0.290748	0.000680603	Pcd	0	0	NO
FBgn0024846	710.479	0.0576346	0.514214	p38b	0	0	NO
FBgn0024887	345.664	-0.314349	0.0170424	kin17	0	0	NO
FBgn0024889	1537.27	0.449542	2.00501e-09	Kap-alpha1	0	0	NO
FBgn0024909	216.419	0.336107	0.00917155	Taf7	0	0	NO
FBgn0024912	200.997	-0.542658	0.00128244	agt	0	0	NO
FBgn0024913	16.5105	-2.88154	1.0281e-06	Actbeta	0	0	NO
FBgn0024920	917.449	0.398709	1.04306e-05	Ts	0	0	NO
FBgn0024921	2080.66	0.165964	0.193265	Tnpo	0	0	NO
FBgn0024941	5.88055	-1.48717	0.035086	RSG7	0	0	NO
FBgn0024943	0.660235	-3.12119	0	PIP82	0	0	NO
FBgn0024944	81.4537	0.572899	0.211068	Oamb	1	2	YES
FBgn0024945	546.978	0.373752	0.00389548	NitFhit	0	0	NO
FBgn0024947	563.779	-0.217676	0.147078	NTPase	1	2	YES
FBgn0024956	497.894	0.30242	0.000288361	Mat1	0	0	NO
FBgn0024957	1082.11	-0.0465957	0.692689	Irp-1B	0	0	NO
FBgn0024958	1158.21	-0.111438	0.171204	Irp-1A	0	0	NO
FBgn0024973	696.076	-0.0795621	0.352289	CG2701	0	0	NO
FBgn0024975	144.499	0.778599	1.25541e-07	CG2712	0	0	NO
FBgn0024980	104.034	-1.99828	3.52558e-17	Syx4	1	6	NO
FBgn0024983	616.968	0.387509	0.00120003	CG4293	0	0	NO
FBgn0024984	332.89	3.41544	6.27776e-121	CG3457	1	0	YES
FBgn0024985	1096.52	-1.103	4.27982e-33	Rilpl	0	0	NO
FBgn0024986	360.075	-0.0628916	0.621766	CG3719	0	0	NO
FBgn0024987	1550.63	-0.111035	0.145465	ssx	0	0	NO
FBgn0024989	67.3378	-1.47322	2.95387e-09	CG3777	0	0	NO
FBgn0024991	329.49	1.17946	2.478e-19	CG2694	0	0	NO
FBgn0024992	732.3	0.722917	2.81194e-22	Spg7	0	0	NO
FBgn0024993	191.444	0.759561	7.73208e-08	CG2662	0	0	NO
FBgn0024994	390.829	0.418699	0.0164571	Ugalt	0	0	NO
FBgn0024995	0.685058	-2.19889	0	CG2680	0	0	NO
FBgn0024996	667.965	-0.00297204	0.978939	eIF2Bbeta	0	0	NO
FBgn0024997	1.25613	0.0461657	0.985145	CG2681	0	0	NO
FBgn0024998	589.71	0.145704	0.0863541	CG2685	0	0	NO
FBgn0025109	358.909	0.0171535	0.901339	Bem46	0	0	NO
FBgn0025111	134.122	-1.51509	6.75442e-11	Ant2	2	4	NO
FBgn0025185	202.838	0.497012	0.000343284	az2	0	0	NO
FBgn0025186	574.943	-0.0407833	0.772026	ari-2	0	0	NO
FBgn0025335	747.717	0.712991	1.69246e-22	Cpes	1	1	YES
FBgn0025336	900.906	0.746315	3.87853e-18	CG4882	0	0	NO
FBgn0025352	2796.53	0.185953	0.0195316	Mtpbeta	1	4	YES
FBgn0025366	5074.2	0.253443	0.00362747	Ip259	0	0	NO
FBgn0025373	1030.16	-0.356302	0.00345173	Fpps	0	0	NO
FBgn0025381	1232.94	-0.561865	3.30459e-07	rush	1	0	YES
FBgn0025382	101.58	-0.137337	0.607057	Rab27	0	0	NO
FBgn0025383	1.66842	-2.24173	0.142302	CG14780	0	0	NO
FBgn0025387	2.35196	-0.207729	0.872704	Alms1b	0	0	NO
FBgn0025388	249.391	0.299705	0.0591751	Alms1a	0	0	NO
FBgn0025390	961.394	1.99264	2.58979e-35	Mur2B	3	4	YES
FBgn0025391	153.718	-3.37772	2.17867e-52	Scgdelta	0	0	NO
FBgn0025393	1.08107	-2.84958	0.135229	CG14795	0	0	NO
FBgn0025394	2066	0.482076	4.46102e-08	inc	2	2	NO
FBgn0025454	19.6099	-0.863866	0.130266	Cyp6g1	0	0	NO
FBgn0025455	1991.64	0.242361	0.000334104	CycT	1	0	NO
FBgn0025456	651.329	-1.42811	0.000134937	CREG	0	0	NO
FBgn0025457	1099.59	-0.0381957	0.644816	Bub3	0	0	NO
FBgn0025463	1924.31	-0.0828189	0.248175	Bap60	0	0	NO
FBgn0025469	196.193	0.307482	0.0511404	slv	1	2	YES
FBgn0025519	250.25	-0.250403	0.101486	fidipidine	0	0	NO
FBgn0025525	243.84	-2.96312	1.15132e-71	bab2	0	0	NO
FBgn0025549	690.565	-0.186437	0.0649374	unc-119	0	0	NO
FBgn0025558	138.052	-0.593284	0.00113952	CG4101	0	0	NO
FBgn0025571	1434.67	-0.199953	0.0669023	SF1	0	0	NO
FBgn0025573	1.38811	-1.29729	0.394308	PpN58A	0	0	NO
FBgn0025574	1598.83	-0.350575	0.00312512	Pli	2	1	NO
FBgn0025582	5797.37	0.216252	0.0290448	eIF3e	0	0	NO
FBgn0025583	4.39079	-1.61666	0.100399	BomS2	0	0	NO
FBgn0025592	678.726	-0.215843	0.0233666	Gk1	0	0	NO
FBgn0025595	2.44563	-2.61265	0.107095	AkhR	1	1	YES
FBgn0025608	1432.16	0.0272582	0.756916	Faf2	0	0	NO
FBgn0025615	1076.96	0.267233	0.000422346	Torsin	0	0	NO
FBgn0025620	6.87803	-3.31078	0.000365634	CG13360	0	0	NO
FBgn0025621	943.23	-0.291128	0.00446461	CG16989	1	3	NO
FBgn0025624	177.563	-0.967297	1.77208e-11	CG4025	1	3	YES
FBgn0025625	96.7496	-4.0992	5.03399e-37	Sik2	1	1	NO
FBgn0025626	812.794	0.417318	8.48515e-06	CG4281	0	0	NO
FBgn0025627	7.12542	0.371446	0.603941	CG4194	0	0	NO
FBgn0025628	721.144	-0.676048	3.14251e-15	CG4199	0	0	NO
FBgn0025629	588.135	0.32341	0.00102457	CG4045	0	0	NO
FBgn0025630	403.214	0.162236	0.145088	Rtca	0	0	NO
FBgn0025631	428.148	-0.849416	2.39158e-08	moody	1	1	YES
FBgn0025632	314.034	-2.07211	1.07045e-51	CG4313	1	1	NO
FBgn0025633	1400.8	1.18211	5.95332e-56	spdi	2	4	YES
FBgn0025634	428.783	0.217377	0.0421286	CG13367	0	0	NO
FBgn0025635	427.635	0.572404	7.88557e-08	Hinfp	0	0	NO
FBgn0025637	4802.46	0.434683	2.9895e-09	SkpA	1	0	YES
FBgn0025638	2162.76	0.0652077	0.40578	Roc1a	0	0	NO
FBgn0025639	1936.14	-0.155056	0.0255513	Hmt4-20	0	0	NO
FBgn0025640	807.176	-0.30143	0.00264517	CG13369	0	0	NO
FBgn0025641	1337.54	1.03082	1.24371e-24	DAAM	2	9	YES
FBgn0025642	3.76855	-2.25147	0.0232241	CG32812	1	3	NO
FBgn0025643	0.946954	-2.61859	0.193769	CG3588	0	0	NO
FBgn0025674	1552.96	0.6732	3.56325e-27	CycK	0	0	NO
FBgn0025676	179.738	-1.28452	1.0232e-18	CkIIalpha-i3	0	0	NO
FBgn0025678	2414.53	0.0224825	0.862168	CaBP1	0	0	NO
FBgn0025680	335.762	-1.57328	4.1438e-15	cry	0	0	NO
FBgn0025681	667.465	-0.118566	0.142407	CG3558	0	0	NO
FBgn0025682	3156.15	-1.06396	4.20304e-25	scf	0	0	NO
FBgn0025684	250.823	0.763426	4.86972e-09	MFS18	0	0	NO
FBgn0025692	7.54879	0.132106	0.87718	Lfg	0	0	NO
FBgn0025693	247.084	-0.81027	7.2086e-13	ZnT41F	0	0	NO
FBgn0025697	35.4569	-1.83768	8.94739e-08	santa-maria	0	0	NO
FBgn0025700	1953.51	0.456307	0.00864422	CG5885	0	0	NO
FBgn0025702	101.722	0.335057	0.110752	Srpk79D	1	0	YES
FBgn0025709	15.2681	-0.509535	0.427256	CNT2	0	0	NO
FBgn0025712	118.806	-3.06275	6.10218e-45	CG13920	0	0	NO
FBgn0025716	815.283	-0.100988	0.266898	Bap55	0	0	NO
FBgn0025720	609.141	0.366647	2.52463e-05	Ate1	0	0	NO
FBgn0025724	2362.65	-0.175128	0.0760508	beta'COP	0	0	NO
FBgn0025725	2102.16	-0.260152	0.000658632	alphaCOP	0	0	NO
FBgn0025726	1536.95	-0.157618	0.0556601	unc-13	0	0	NO
FBgn0025739	177.931	-0.765077	0.00125349	pon	0	0	NO
FBgn0025740	523.359	-0.869725	6.18761e-17	PlexB	0	0	NO
FBgn0025741	3845.1	-0.732452	1.2156e-41	PlexA	2	1	NO
FBgn0025742	994.552	-0.347855	3.67031e-06	mtm	0	0	NO
FBgn0025743	1044.38	0.25429	0.00116863	mbt	1	0	NO
FBgn0025777	817.749	0.390398	9.02508e-08	homer	0	0	NO
FBgn0025781	612.807	0.525022	6.64338e-09	Cdc16	0	0	NO
FBgn0025790	825.792	-0.53561	1.32266e-08	TBPH	0	0	NO
FBgn0025800	1821.96	-0.502507	4.72401e-19	Smox	1	3	NO
FBgn0025802	669.003	-0.845554	4.49745e-23	Sbf	0	0	NO
FBgn0025807	167.812	0.551253	0.000320821	Rad9	0	0	NO
FBgn0025808	223.117	1.15183	5.24191e-16	Rad17	1	1	YES
FBgn0025809	925.439	0.538563	2.01453e-09	Paf-AHalpha	0	0	NO
FBgn0025814	741.701	-0.178678	0.0198844	Mgstl	1	1	YES
FBgn0025815	1672.07	0.183755	0.0221644	Mcm6	0	0	NO
FBgn0025820	163.811	-0.214668	0.156479	JTBR	0	0	NO
FBgn0025830	376.216	-0.510181	2.06799e-07	IntS8	0	0	NO
FBgn0025832	495.491	0.589316	1.07563e-09	Fen1	0	0	NO
FBgn0025835	1.20512	-0.372595	0.829827	CG17707	0	0	NO
FBgn0025836	1745.37	-0.332328	1.14721e-05	RhoGAP1A	0	0	NO
FBgn0025837	0.713268	1.48654	0	CG17636	0	0	NO
FBgn0025839	673.968	-0.0198426	0.847791	ND-B14.5A	0	0	NO
FBgn0025864	1735.92	-0.308692	0.00069881	Crag	1	1	NO
FBgn0025865	1515.1	-0.488199	6.4177e-07	Cortactin	0	0	NO
FBgn0025866	1191.07	-1.0207	3.07792e-48	CalpB	0	0	NO
FBgn0025874	222.114	0.049053	0.728321	Meics	0	0	NO
FBgn0025878	8.18992	-0.528217	0.479086	wrapper	0	0	NO
FBgn0025879	1248.03	-1.64467	2.42744e-40	Timp	0	0	NO
FBgn0025881	3.07643	0.337247	0.781308	snoRNA:Me18S-A1576	0	0	NO
FBgn0025882	0.518315	-2.77843	0	snoRNA:MeU6-A47	0	0	NO
FBgn0025885	5288.65	-1.97115	8.32707e-248	Inos	1	1	NO
FBgn0025936	1770.74	-1.02895	5.66046e-50	Eph	0	0	NO
FBgn0026015	1090.45	0.101704	0.130505	Top3beta	0	0	NO
FBgn0026056	441.497	-0.126633	0.248074	Rlip	0	0	NO
FBgn0026059	1695.57	-1.84715	4.1738e-112	Mhcl	1	2	NO
FBgn0026060	75.7862	0.309829	0.17336	Mipp2	1	3	YES
FBgn0026061	2559.24	-1.69338	5.09236e-68	Mipp1	0	0	NO
FBgn0026076	888.121	-0.305191	0.00425284	UBL3	0	0	NO
FBgn0026077	395.196	-4.19022	3.56098e-69	Gasp	1	1	YES
FBgn0026079	1161.69	0.293021	0.0418069	Nsun2	0	0	NO
FBgn0026080	332.187	-0.201348	0.100067	Tip60	0	0	NO
FBgn0026083	4010.67	1.12739	3.08613e-37	tyf	1	2	YES
FBgn0026084	10585	-1.0366	2.35608e-20	cib	2	2	YES
FBgn0026085	180.457	0.321989	0.0529338	dgt4	1	1	YES
FBgn0026086	506.409	-0.501567	1.27862e-05	Adar	0	0	NO
FBgn0026088	276.335	-0.930107	1.7886e-14	CG14818	1	1	YES
FBgn0026089	516.265	0.505153	3.76776e-05	CG14817	0	0	NO
FBgn0026090	406.042	-0.178124	0.0740275	Lamtor5	0	0	NO
FBgn0026143	647.417	0.786564	4.67949e-16	Cdc45	0	0	NO
FBgn0026144	1694.47	0.69132	2.05591e-15	CBP	1	4	YES
FBgn0026147	1591.37	0.643009	1.26798e-18	TTLL4A	1	0	YES
FBgn0026148	178.826	0.571304	2.35803e-05	CG12253	1	0	NO
FBgn0026149	585.686	-0.0753045	0.435929	BCL7-like	0	0	NO
FBgn0026150	1437.52	0.311906	3.66049e-05	ApepP	0	0	NO
FBgn0026160	787.095	-2.27916	3.37909e-69	tna	0	0	NO
FBgn0026169	8.28898	-1.37278	0.112078	snoRNA:Psi18S-1820	0	0	NO
FBgn0026175	16.9369	-2.20988	1.74174e-06	SkpC	0	0	NO
FBgn0026176	12.3058	0.211981	0.737755	SkpB	0	0	NO
FBgn0026179	832.093	-0.275384	0.000804876	siz	2	3	NO
FBgn0026181	1636.52	-0.386491	1.59103e-07	Rok	0	0	NO
FBgn0026189	1674.12	-1.06714	1.09882e-42	promL	1	1	YES
FBgn0026190	0.802825	-3.3044	0.280379	PH4alphaMP	0	0	NO
FBgn0026192	801.325	0.255198	0.00525435	par-6	0	0	NO
FBgn0026196	6973.05	0.640117	9.20815e-17	nop5	0	0	NO
FBgn0026197	4.64003	1.70633	0.0920886	lncRNA:noe	0	0	NO
FBgn0026199	1256.44	-1.43093	1.97206e-73	myo	0	0	NO
FBgn0026206	1452.79	0.698188	1.87648e-22	mei-P26	1	5	YES
FBgn0026207	711.96	-0.11374	0.232861	mbo	0	0	NO
FBgn0026238	1575.25	0.23194	0.00373332	gus	0	0	NO
FBgn0026239	1015.65	-1.21062	5.05757e-58	gukh	0	0	NO
FBgn0026250	6856.07	0.308297	2.73653e-09	eIF1A	0	0	NO
FBgn0026252	9288.4	0.853244	4.60917e-20	msk	0	0	NO
FBgn0026255	84.0573	-2.03526	1.95865e-16	clumsy	0	0	NO
FBgn0026257	384.536	0.968934	7.26924e-15	cav	1	1	YES
FBgn0026259	4328.67	0.552061	1.59369e-10	eIF5B	0	0	NO
FBgn0026261	756.491	0.67972	7.69705e-13	bonsai	0	0	NO
FBgn0026262	2682.43	-0.525449	2.91279e-17	Taf3	1	1	NO
FBgn0026263	541.116	-0.199043	0.0522206	bip1	0	0	NO
FBgn0026309	704.262	-0.0170851	0.875823	aft	0	0	NO
FBgn0026313	681.473	0.316894	0.000249339	X11L	0	0	NO
FBgn0026314	2.745	-2.5265	0.0453836	Ugt35B1	0	0	NO
FBgn0026315	155.894	-1.53074	1.13761e-17	Ugt35A1	0	0	NO
FBgn0026316	1032.36	0.112939	0.138474	Ubc10	0	0	NO
FBgn0026317	1130.71	0.407317	2.4362e-08	Tsc1	0	0	NO
FBgn0026319	334.51	-2.05529	2.51737e-64	Traf4	0	0	NO
FBgn0026320	1.36483	0.642848	0.742203	Tom	0	0	NO
FBgn0026323	781.537	-0.297079	0.000784245	Tak1	0	0	NO
FBgn0026324	319.386	0.218648	0.070855	Taf10b	0	0	NO
FBgn0026326	761.845	0.316624	3.76705e-05	Mad1	0	0	NO
FBgn0026361	260.16	0.460158	0.00185824	Septin5	0	0	NO
FBgn0026369	851.693	-0.547321	1.19815e-10	Sara	0	0	NO
FBgn0026371	253.303	-0.21192	0.168715	SAK	0	0	NO
FBgn0026372	41833.7	0.202769	0.00770882	RpL23A	1	1	YES
FBgn0026373	472.333	0.211164	0.0616449	Polr2C	0	0	NO
FBgn0026374	105.852	-1.13477	1.82841e-08	Rhp	0	0	NO
FBgn0026375	1568.17	0.0612294	0.532948	RhoGAPp190	1	1	NO
FBgn0026376	967.679	-1.3726	2.67801e-36	Rgl	1	1	NO
FBgn0026378	357.39	-0.415557	0.000631737	Rep	0	0	NO
FBgn0026379	664.55	0.318452	4.31735e-05	Pten	0	0	NO
FBgn0026380	2153.08	0.308699	3.72995e-05	Prosbeta3	0	0	NO
FBgn0026391	0.713152	-3.13309	0	Or33b	0	0	NO
FBgn0026393	86.5756	0.37446	0.0636147	Or43b	0	0	NO
FBgn0026400	705	0.604339	5.32351e-12	Noa36	0	0	NO
FBgn0026401	2984.13	-0.330696	0.000113807	Nipped-B	2	4	YES
FBgn0026402	287.602	0.290635	0.00695619	NiPp1	0	0	NO
FBgn0026403	3.42109	-1.18887	0.328474	Ndg	0	0	NO
FBgn0026404	462.519	-0.172883	0.164437	Dronc	0	0	NO
FBgn0026409	11250.4	-0.0015741	0.984559	Mpcp2	0	0	NO
FBgn0026411	11.2045	-1.14543	0.0334071	Lim1	1	3	YES
FBgn0026415	1447.52	-0.618879	1.04345e-05	Idgf4	1	0	YES
FBgn0026417	90.3526	-0.195908	0.396147	Hus1-like	0	0	NO
FBgn0026418	7248.46	0.152314	0.199202	Hsc70Cb	0	0	NO
FBgn0026427	1061.28	-0.406821	1.46725e-05	Su(var)2-HP2	0	0	NO
FBgn0026428	1687.84	1.60989	5.47319e-144	HDAC6	1	2	YES
FBgn0026430	2215.62	1.86943	1.7849e-221	Grip84	1	1	YES
FBgn0026431	419.312	0.254773	0.019627	Grip75	0	0	NO
FBgn0026432	298.39	0.233175	0.05489	Grip163	1	1	YES
FBgn0026433	597.452	0.584851	8.74245e-10	Grip128	0	0	NO
FBgn0026439	103.404	0.871852	0.00970262	Eaat1	0	0	NO
FBgn0026441	713.346	-0.172198	0.0391385	ear	0	0	NO
FBgn0026479	2090.97	-0.0124393	0.899763	Drp1	0	0	NO
FBgn0026533	3495.42	-0.0126395	0.841148	Dek	0	0	NO
FBgn0026562	3735.54	-2.05665	6.63312e-82	SPARC	0	0	NO
FBgn0026563	2.15966	-4.80812	0.00975639	CG1979	0	0	NO
FBgn0026565	1.21399	-3.11532	0.0868721	Ass	0	0	NO
FBgn0026566	1334.49	0.665094	3.80643e-18	CG1307	1	1	YES
FBgn0026570	108.975	-0.143921	0.502518	CG5704	0	0	NO
FBgn0026573	825.437	0.535937	2.69117e-08	ADD1	0	0	NO
FBgn0026575	2067.25	-0.058766	0.623708	hang	1	0	YES
FBgn0026576	883.639	0.201649	0.174144	Pisd	0	0	NO
FBgn0026577	1185.07	-0.403576	1.45169e-06	CG8677	0	0	NO
FBgn0026582	126.627	0.0856049	0.683492	Hmg-2	0	0	NO
FBgn0026592	129.447	-4.69081	8.51368e-66	Fie	0	0	NO
FBgn0026593	180.536	0.569696	0.00342393	CG5707	0	0	NO
FBgn0026597	911.565	0.246699	0.00204196	Axn	0	0	NO
FBgn0026598	413.592	0.362295	0.000358923	Apc2	0	0	NO
FBgn0026602	691.629	-0.961719	3.89148e-14	Adk3	0	0	NO
FBgn0026616	503.512	1.20681	5.17635e-32	alpha-Man-IIb	1	1	YES
FBgn0026619	327.117	0.758731	1.26632e-11	Taz	1	0	NO
FBgn0026620	2834.34	-0.390483	1.61847e-08	tacc	1	1	YES
FBgn0026630	759.476	0.204125	0.0166577	nes	0	0	NO
FBgn0026634	466.22	0.221754	0.0247325	Cog2	0	0	NO
FBgn0026666	202.81	0.377602	0.00418197	MagR	0	0	NO
FBgn0026679	621.126	-0.341309	0.00161906	IntS4	0	0	NO
FBgn0026702	534.818	0.89195	1.23187e-16	Pop1	0	0	NO
FBgn0026713	1825.48	-0.803885	1.06306e-35	Prp16	5	4	YES
FBgn0026718	609.597	2.50908	2.01411e-91	Agpat2	2	4	YES
FBgn0026721	169.199	-4.83884	3.87327e-59	fat-spondin	0	0	NO
FBgn0026722	802.245	0.276316	0.00194592	drosha	0	0	NO
FBgn0026737	315.725	-0.0796158	0.493593	CG6171	0	0	NO
FBgn0026738	387.189	0.884227	2.24099e-14	CG7857	0	0	NO
FBgn0026741	469.36	0.302686	0.00814033	mRpL18	0	0	NO
FBgn0026749	641.584	-0.699353	1.85768e-07	Ype	0	0	NO
FBgn0026751	461.772	0.0110455	0.924012	XRCC1	1	1	NO
FBgn0026761	1610.78	0.433275	1.2922e-06	Trap1	1	0	YES
FBgn0026777	2490.42	0.054606	0.536945	Rad23	0	0	NO
FBgn0026787	412.591	-0.157601	0.232542	Nhe1	0	0	NO
FBgn0026869	2538.28	-1.26882	1.02815e-50	Tdg	1	3	NO
FBgn0026872	169.693	-0.731638	8.04303e-07	CG14777	1	1	NO
FBgn0026873	474.264	0.584584	2.41856e-09	MED18	1	1	YES
FBgn0026874	3.0332	-0.841461	0.480222	CG13358	0	0	NO
FBgn0026876	436.662	-0.149236	0.33848	CG11403	0	0	NO
FBgn0026878	70.7018	0.189576	0.392735	CG4325	0	0	NO
FBgn0026879	1678.25	0.43709	3.05365e-08	CG13364	0	0	NO
FBgn0027052	536.787	0.30619	0.00578405	STUB1	0	0	NO
FBgn0027053	1081.92	0.258688	0.0001377	CSN5	0	0	NO
FBgn0027054	1101.74	0.240686	0.00266382	CSN4	0	0	NO
FBgn0027055	967.923	0.110407	0.206226	CSN3	0	0	NO
FBgn0027057	981.135	0.0870846	0.292841	CSN1b	0	0	NO
FBgn0027066	3986.26	-0.392435	1.90885e-07	Eb1	0	0	NO
FBgn0027070	133.506	1.64165	2.06566e-21	Ugt36E1	0	0	NO
FBgn0027073	66.9087	-3.50171	3.2413e-37	Ugt49B1	0	0	NO
FBgn0027074	9.10909	-2.5613	0.00048437	Ugt36F1	0	0	NO
FBgn0027079	1473.5	0.527517	2.51593e-07	ValRS	0	0	NO
FBgn0027080	2336.34	0.861113	3.8542e-41	TyrRS	0	0	NO
[truncated: 8,804 more rows]
